# Supplementary material for: Chromosome-scale genome assembly of kiwifruit Actinidia eriantha with single-molecule sequencing and chromatin interaction mapping
Source: PubMed Central journal article supplement (PMC6446220; doi:10.1093/gigascience/giz027), 2019-04-03
Supplement: giz027_giga-d-18-00282_revision_3.pdf [file giz027_giga-d-18-00282_revision_3.pdf]

# GigaScience

## Chromosome-scale genome assembly of kiwifruit *Actinidia eriantha* with single-molecule sequencing and chromatin conformation capture --Manuscript Draft--

|                                                      |                                                                                                                                                                                                                                                                                                                                                                                                                                                                                                                                                                                                                                                                                                                                                                                                                                                                                                                                                                                                                                                                                                                                                                                                                                                                                                                                                                                                                                                                                                                                                                                                                                                                                                                                                                                                                      |                   |
|------------------------------------------------------|----------------------------------------------------------------------------------------------------------------------------------------------------------------------------------------------------------------------------------------------------------------------------------------------------------------------------------------------------------------------------------------------------------------------------------------------------------------------------------------------------------------------------------------------------------------------------------------------------------------------------------------------------------------------------------------------------------------------------------------------------------------------------------------------------------------------------------------------------------------------------------------------------------------------------------------------------------------------------------------------------------------------------------------------------------------------------------------------------------------------------------------------------------------------------------------------------------------------------------------------------------------------------------------------------------------------------------------------------------------------------------------------------------------------------------------------------------------------------------------------------------------------------------------------------------------------------------------------------------------------------------------------------------------------------------------------------------------------------------------------------------------------------------------------------------------------|-------------------|
| <b>Manuscript Number:</b>                            | GIGA-D-18-00282R3                                                                                                                                                                                                                                                                                                                                                                                                                                                                                                                                                                                                                                                                                                                                                                                                                                                                                                                                                                                                                                                                                                                                                                                                                                                                                                                                                                                                                                                                                                                                                                                                                                                                                                                                                                                                    |                   |
| <b>Full Title:</b>                                   | Chromosome-scale genome assembly of kiwifruit <i>Actinidia eriantha</i> with single-molecule sequencing and chromatin conformation capture                                                                                                                                                                                                                                                                                                                                                                                                                                                                                                                                                                                                                                                                                                                                                                                                                                                                                                                                                                                                                                                                                                                                                                                                                                                                                                                                                                                                                                                                                                                                                                                                                                                                           |                   |
| <b>Article Type:</b>                                 | Data Note                                                                                                                                                                                                                                                                                                                                                                                                                                                                                                                                                                                                                                                                                                                                                                                                                                                                                                                                                                                                                                                                                                                                                                                                                                                                                                                                                                                                                                                                                                                                                                                                                                                                                                                                                                                                            |                   |
| <b>Funding Information:</b>                          | National Natural Science Foundation of China (31471157)                                                                                                                                                                                                                                                                                                                                                                                                                                                                                                                                                                                                                                                                                                                                                                                                                                                                                                                                                                                                                                                                                                                                                                                                                                                                                                                                                                                                                                                                                                                                                                                                                                                                                                                                                              | Dr. Yongsheng Liu |
|                                                      | National Science Foundation (IOS-1339287)                                                                                                                                                                                                                                                                                                                                                                                                                                                                                                                                                                                                                                                                                                                                                                                                                                                                                                                                                                                                                                                                                                                                                                                                                                                                                                                                                                                                                                                                                                                                                                                                                                                                                                                                                                            | Dr. Zhangjun Fei  |
| <b>Abstract:</b>                                     | <p>Background: Kiwifruit (<i>Actinidia</i> spp.) is a dioecious plant with fruits containing abundant vitamin C and minerals. A handful of kiwifruit species have been domesticated, among which the <i>A. eriantha</i> is increasingly favored in breeding due to its superior commercial traits. Recently, elite cultivars from <i>A. eriantha</i> have been successfully selected and further studies on their biology and breeding potential require genomic information which is currently unavailable.</p> <p>Findings: Here, we assembled a chromosome-scale genome sequence of <i>A. eriantha</i> cv. 'White' using single-molecular sequencing and chromatin interaction map based scaffolding. The assembly has a total size of 690.6 Mb and an N50 of 21.7 Mb. Approximately 99% of the assembly were in 29 pseudomolecules corresponding to the 29 kiwifruit chromosomes. Forty-three percent of the <i>A. eriantha</i> genome are repetitive sequences, and the non-repetitive part encodes 42,988 protein-coding genes, of which 39,075 have homologues from other plant species or protein domains. The divergence time between <i>A. eriantha</i> and its close relative <i>A. chinensis</i> is estimated to be 3.3 million years, and after diversification, 1,727 and 1,506 gene families are expanded or contracted in <i>A. eriantha</i>, respectively.</p> <p>Conclusions: We provide a high-quality reference genome for kiwifruit <i>A. eriantha</i>. This chromosome-scale genome assembly is substantially better than two published kiwifruit assemblies from <i>A. chinensis</i> in terms of genome contiguity and completeness. The availability of <i>A. eriantha</i> genome provides a valuable resource for facilitating kiwifruit breeding and the studies of kiwifruit biology.</p> |                   |
| <b>Corresponding Author:</b>                         | Zhangjun Fei<br>Boyce Thompson Institute for Plant Research<br>Ithaca, NY UNITED STATES                                                                                                                                                                                                                                                                                                                                                                                                                                                                                                                                                                                                                                                                                                                                                                                                                                                                                                                                                                                                                                                                                                                                                                                                                                                                                                                                                                                                                                                                                                                                                                                                                                                                                                                              |                   |
| <b>Corresponding Author Secondary Information:</b>   |                                                                                                                                                                                                                                                                                                                                                                                                                                                                                                                                                                                                                                                                                                                                                                                                                                                                                                                                                                                                                                                                                                                                                                                                                                                                                                                                                                                                                                                                                                                                                                                                                                                                                                                                                                                                                      |                   |
| <b>Corresponding Author's Institution:</b>           | Boyce Thompson Institute for Plant Research                                                                                                                                                                                                                                                                                                                                                                                                                                                                                                                                                                                                                                                                                                                                                                                                                                                                                                                                                                                                                                                                                                                                                                                                                                                                                                                                                                                                                                                                                                                                                                                                                                                                                                                                                                          |                   |
| <b>Corresponding Author's Secondary Institution:</b> |                                                                                                                                                                                                                                                                                                                                                                                                                                                                                                                                                                                                                                                                                                                                                                                                                                                                                                                                                                                                                                                                                                                                                                                                                                                                                                                                                                                                                                                                                                                                                                                                                                                                                                                                                                                                                      |                   |
| <b>First Author:</b>                                 | Zhangjun Fei                                                                                                                                                                                                                                                                                                                                                                                                                                                                                                                                                                                                                                                                                                                                                                                                                                                                                                                                                                                                                                                                                                                                                                                                                                                                                                                                                                                                                                                                                                                                                                                                                                                                                                                                                                                                         |                   |
| <b>First Author Secondary Information:</b>           |                                                                                                                                                                                                                                                                                                                                                                                                                                                                                                                                                                                                                                                                                                                                                                                                                                                                                                                                                                                                                                                                                                                                                                                                                                                                                                                                                                                                                                                                                                                                                                                                                                                                                                                                                                                                                      |                   |
| <b>Order of Authors:</b>                             | Zhangjun Fei                                                                                                                                                                                                                                                                                                                                                                                                                                                                                                                                                                                                                                                                                                                                                                                                                                                                                                                                                                                                                                                                                                                                                                                                                                                                                                                                                                                                                                                                                                                                                                                                                                                                                                                                                                                                         |                   |
|                                                      | Wei Tang                                                                                                                                                                                                                                                                                                                                                                                                                                                                                                                                                                                                                                                                                                                                                                                                                                                                                                                                                                                                                                                                                                                                                                                                                                                                                                                                                                                                                                                                                                                                                                                                                                                                                                                                                                                                             |                   |
|                                                      | Xuepeng Sun                                                                                                                                                                                                                                                                                                                                                                                                                                                                                                                                                                                                                                                                                                                                                                                                                                                                                                                                                                                                                                                                                                                                                                                                                                                                                                                                                                                                                                                                                                                                                                                                                                                                                                                                                                                                          |                   |
|                                                      | Junyang Yue                                                                                                                                                                                                                                                                                                                                                                                                                                                                                                                                                                                                                                                                                                                                                                                                                                                                                                                                                                                                                                                                                                                                                                                                                                                                                                                                                                                                                                                                                                                                                                                                                                                                                                                                                                                                          |                   |
|                                                      | Xiaofeng Tang                                                                                                                                                                                                                                                                                                                                                                                                                                                                                                                                                                                                                                                                                                                                                                                                                                                                                                                                                                                                                                                                                                                                                                                                                                                                                                                                                                                                                                                                                                                                                                                                                                                                                                                                                                                                        |                   |
|                                                      | Chen Jiao                                                                                                                                                                                                                                                                                                                                                                                                                                                                                                                                                                                                                                                                                                                                                                                                                                                                                                                                                                                                                                                                                                                                                                                                                                                                                                                                                                                                                                                                                                                                                                                                                                                                                                                                                                                                            |                   |
|                                                      | Ying Yang                                                                                                                                                                                                                                                                                                                                                                                                                                                                                                                                                                                                                                                                                                                                                                                                                                                                                                                                                                                                                                                                                                                                                                                                                                                                                                                                                                                                                                                                                                                                                                                                                                                                                                                                                                                                            |                   |

|                                                |                                                                                                                                                                                                                                                                                                                                                                                                                                                                                                                                                                                                                                                                                                                                                                                                                                                                                                                                                                                                                                                                                                                                                                                                                                                                                                                                                                                                                                                                                                                                                                                                                                                                                                                                                                                                                                                                                                                                                                                                                                                                                                                                                                                                                                                                                                                                                                                                                                                                                                                                                                                                                                                                                                                                                                                                                                                                                                                                                                                                                                                                                     |
|------------------------------------------------|-------------------------------------------------------------------------------------------------------------------------------------------------------------------------------------------------------------------------------------------------------------------------------------------------------------------------------------------------------------------------------------------------------------------------------------------------------------------------------------------------------------------------------------------------------------------------------------------------------------------------------------------------------------------------------------------------------------------------------------------------------------------------------------------------------------------------------------------------------------------------------------------------------------------------------------------------------------------------------------------------------------------------------------------------------------------------------------------------------------------------------------------------------------------------------------------------------------------------------------------------------------------------------------------------------------------------------------------------------------------------------------------------------------------------------------------------------------------------------------------------------------------------------------------------------------------------------------------------------------------------------------------------------------------------------------------------------------------------------------------------------------------------------------------------------------------------------------------------------------------------------------------------------------------------------------------------------------------------------------------------------------------------------------------------------------------------------------------------------------------------------------------------------------------------------------------------------------------------------------------------------------------------------------------------------------------------------------------------------------------------------------------------------------------------------------------------------------------------------------------------------------------------------------------------------------------------------------------------------------------------------------------------------------------------------------------------------------------------------------------------------------------------------------------------------------------------------------------------------------------------------------------------------------------------------------------------------------------------------------------------------------------------------------------------------------------------------------|
|                                                | Xiangli Niu                                                                                                                                                                                                                                                                                                                                                                                                                                                                                                                                                                                                                                                                                                                                                                                                                                                                                                                                                                                                                                                                                                                                                                                                                                                                                                                                                                                                                                                                                                                                                                                                                                                                                                                                                                                                                                                                                                                                                                                                                                                                                                                                                                                                                                                                                                                                                                                                                                                                                                                                                                                                                                                                                                                                                                                                                                                                                                                                                                                                                                                                         |
|                                                | Min Miao                                                                                                                                                                                                                                                                                                                                                                                                                                                                                                                                                                                                                                                                                                                                                                                                                                                                                                                                                                                                                                                                                                                                                                                                                                                                                                                                                                                                                                                                                                                                                                                                                                                                                                                                                                                                                                                                                                                                                                                                                                                                                                                                                                                                                                                                                                                                                                                                                                                                                                                                                                                                                                                                                                                                                                                                                                                                                                                                                                                                                                                                            |
|                                                | Danfeng Zhang                                                                                                                                                                                                                                                                                                                                                                                                                                                                                                                                                                                                                                                                                                                                                                                                                                                                                                                                                                                                                                                                                                                                                                                                                                                                                                                                                                                                                                                                                                                                                                                                                                                                                                                                                                                                                                                                                                                                                                                                                                                                                                                                                                                                                                                                                                                                                                                                                                                                                                                                                                                                                                                                                                                                                                                                                                                                                                                                                                                                                                                                       |
|                                                | Shengxiong Huang                                                                                                                                                                                                                                                                                                                                                                                                                                                                                                                                                                                                                                                                                                                                                                                                                                                                                                                                                                                                                                                                                                                                                                                                                                                                                                                                                                                                                                                                                                                                                                                                                                                                                                                                                                                                                                                                                                                                                                                                                                                                                                                                                                                                                                                                                                                                                                                                                                                                                                                                                                                                                                                                                                                                                                                                                                                                                                                                                                                                                                                                    |
|                                                | Wei Shi                                                                                                                                                                                                                                                                                                                                                                                                                                                                                                                                                                                                                                                                                                                                                                                                                                                                                                                                                                                                                                                                                                                                                                                                                                                                                                                                                                                                                                                                                                                                                                                                                                                                                                                                                                                                                                                                                                                                                                                                                                                                                                                                                                                                                                                                                                                                                                                                                                                                                                                                                                                                                                                                                                                                                                                                                                                                                                                                                                                                                                                                             |
|                                                | Mingzhang Li                                                                                                                                                                                                                                                                                                                                                                                                                                                                                                                                                                                                                                                                                                                                                                                                                                                                                                                                                                                                                                                                                                                                                                                                                                                                                                                                                                                                                                                                                                                                                                                                                                                                                                                                                                                                                                                                                                                                                                                                                                                                                                                                                                                                                                                                                                                                                                                                                                                                                                                                                                                                                                                                                                                                                                                                                                                                                                                                                                                                                                                                        |
|                                                | Congbing Fang                                                                                                                                                                                                                                                                                                                                                                                                                                                                                                                                                                                                                                                                                                                                                                                                                                                                                                                                                                                                                                                                                                                                                                                                                                                                                                                                                                                                                                                                                                                                                                                                                                                                                                                                                                                                                                                                                                                                                                                                                                                                                                                                                                                                                                                                                                                                                                                                                                                                                                                                                                                                                                                                                                                                                                                                                                                                                                                                                                                                                                                                       |
|                                                | Yongsheng Liu                                                                                                                                                                                                                                                                                                                                                                                                                                                                                                                                                                                                                                                                                                                                                                                                                                                                                                                                                                                                                                                                                                                                                                                                                                                                                                                                                                                                                                                                                                                                                                                                                                                                                                                                                                                                                                                                                                                                                                                                                                                                                                                                                                                                                                                                                                                                                                                                                                                                                                                                                                                                                                                                                                                                                                                                                                                                                                                                                                                                                                                                       |
| <b>Order of Authors Secondary Information:</b> |                                                                                                                                                                                                                                                                                                                                                                                                                                                                                                                                                                                                                                                                                                                                                                                                                                                                                                                                                                                                                                                                                                                                                                                                                                                                                                                                                                                                                                                                                                                                                                                                                                                                                                                                                                                                                                                                                                                                                                                                                                                                                                                                                                                                                                                                                                                                                                                                                                                                                                                                                                                                                                                                                                                                                                                                                                                                                                                                                                                                                                                                                     |
| <b>Response to Reviewers:</b>                  | <p>Editor:</p> <p>The reviewer has brought up the issue with gene names, and INSDC guidelines for locus tags (see below) they give an example that includes the chromosome number. If used correctly, locus tags can be tracked through different genome builds. See: <a href="https://www.ebi.ac.uk/ena/submit/locus-tags">https://www.ebi.ac.uk/ena/submit/locus-tags</a> or <a href="https://www.ncbi.nlm.nih.gov/genomes/locustag/Proposal.pdf">https://www.ncbi.nlm.nih.gov/genomes/locustag/Proposal.pdf</a></p> <p>We (like the reviewer) recommend following these guidelines. The wording in the INSDC guidelines is " It is preferable to use the same numbering convention for all locus_tags within a project no matter whether the gene is a protein coding gene or structural RNA or from one chromosome or another. "</p> <p>We also notice that you have not used the assigned Locus Tag prefix, in the BioProject (PRJNA480681) the locus tag prefix is designated as "DTZ79_" but you have used "Ace" which is too short and likely not unique enough.</p> <p>Response: Thanks. We have updated gene names by replacing the locus tag prefix "Ace" with "DTZ79_". The updated files will be uploaded to GigaDB, and we are also in the process of submitting the genome annotations to NCBI.</p> <p>We have read the guidelines carefully and now confirmed that our current gene names are consistent these guidelines. We will follow these guidelines for any future updates.</p> <p>The genome assembly you have submitted to the INSDC has quoted accession number QOVS01000000, but that's not public so we can't see what they have used there for gene names or locus tags. Can you please also ensure that all the public data is now available.</p> <p>Response: The genome assembly is now public (<a href="https://www.ncbi.nlm.nih.gov/nucleotide/QOVS00000000.1">https://www.ncbi.nlm.nih.gov/nucleotide/QOVS00000000.1</a>). We ensure that all the public data is now available. In addition, we have updated "Availability of supporting data" section (Line 293-295) in the revised manuscript.</p> <p>Reviewer #1:</p> <p>This new genome looks like a fantastic improvement to the existing ones in the literature. For the gene models I understand that this is how the community is naming, but I personally have quite strong opinion that this is not the best way. I will let the editor decide what to do on this.</p> <p>Response: Thanks. Please see our responses to Editor's comments.</p> <p>The two examples the authors have given for missing genes are compelling, I would be very happy to if the other 9,998 were like that, as this would represent a much fuller gene lists.</p> <p>Response: Thanks. Again, as stated in our previous response, 90.9% of predicted genes were supported by at least one annotation from seven protein and domain databases searched, and of the remaining genes 71.5% had FPKM value <math>\geq 1</math>. These suggest that the majority of the predicted genes should be reliable.</p> |
| <b>Additional Information:</b>                 |                                                                                                                                                                                                                                                                                                                                                                                                                                                                                                                                                                                                                                                                                                                                                                                                                                                                                                                                                                                                                                                                                                                                                                                                                                                                                                                                                                                                                                                                                                                                                                                                                                                                                                                                                                                                                                                                                                                                                                                                                                                                                                                                                                                                                                                                                                                                                                                                                                                                                                                                                                                                                                                                                                                                                                                                                                                                                                                                                                                                                                                                                     |

| Question                                                                                                                                                                                                                                                                                                                                                                                                                                                                                                                            | Response   |
|-------------------------------------------------------------------------------------------------------------------------------------------------------------------------------------------------------------------------------------------------------------------------------------------------------------------------------------------------------------------------------------------------------------------------------------------------------------------------------------------------------------------------------------|------------|
| <p>Are you submitting this manuscript to a special series or article collection?</p>                                                                                                                                                                                                                                                                                                                                                                                                                                                | <p>No</p>  |
| <p><b>Experimental design and statistics</b></p> <p>Full details of the experimental design and statistical methods used should be given in the Methods section, as detailed in our <a href="#">Minimum Standards Reporting Checklist</a>. Information essential to interpreting the data presented should be made available in the figure legends.</p> <p>Have you included all the information requested in your manuscript?</p>                                                                                                  | <p>Yes</p> |
| <p><b>Resources</b></p> <p>A description of all resources used, including antibodies, cell lines, animals and software tools, with enough information to allow them to be uniquely identified, should be included in the Methods section. Authors are strongly encouraged to cite <a href="#">Research Resource Identifiers</a> (RRIDs) for antibodies, model organisms and tools, where possible.</p> <p>Have you included the information requested as detailed in our <a href="#">Minimum Standards Reporting Checklist</a>?</p> | <p>Yes</p> |
| <p><b>Availability of data and materials</b></p> <p>All datasets and code on which the conclusions of the paper rely must be either included in your submission or deposited in <a href="#">publicly available repositories</a> (where available and ethically appropriate), referencing such data using a unique identifier in the references and in the “Availability of Data and Materials” section of your manuscript.</p>                                                                                                      | <p>Yes</p> |

Have you have met the above requirement as detailed in our [Minimum Standards Reporting Checklist?](#)

[Click here to view linked References](#)

1  
2  
3  
4  
5  
6  
7  
8  
9  
10  
11  
12  
13  
14  
15  
16  
17  
18  
19  
20  
21  
22  
23  
24  
25  
26  
27  
28  
29  
30  
31  
32  
33  
34  
35  
36  
37  
38  
39  
40  
41  
42  
43  
44  
45  
46  
47  
48  
49  
50  
51  
52  
53  
54  
55  
56  
57  
58  
59  
60  
61  
62  
63  
64  
65

1     **Chromosome-scale genome assembly of kiwifruit *Actinidia eriantha* with single-molecule**  
2                                     **sequencing and chromatin interaction mapping**

3  
4     Wei Tang<sup>1,2,3\*</sup>, Xuepeng Sun<sup>4\*</sup>, Junyang Yue<sup>1,3\*</sup>, Xiaofeng Tang<sup>1,3</sup>, Chen Jiao<sup>4</sup>, Ying Yang<sup>1</sup>,  
5     Xiangli Niu<sup>1,3</sup>, Min Miao<sup>1,3</sup>, Danfeng Zhang<sup>3</sup>, Shengxiong Huang<sup>3</sup>, Wei Shi<sup>3</sup>, Mingzhang Li<sup>5</sup>,  
6     Congbing Fang<sup>1</sup>, Zhangjun Fei<sup>4,6\*</sup>, Yongsheng Liu<sup>1,2,3\*</sup>

7  
8     <sup>1</sup>School of Horticulture, Anhui Agricultural University, Hefei 230036, China

9     <sup>2</sup>Ministry of Education Key Laboratory for Bio-resource and Eco-environment, College of Life  
10    Science, State Key Laboratory of Hydraulics and Mountain River Engineering, Sichuan University,  
11    Chengdu 610064, China

12    <sup>3</sup>School of Food Science and Engineering, Hefei University of Technology, Hefei 230009, China

13    <sup>4</sup>Boyce Thompson Institute, Cornell University, Ithaca NY 14853, USA

14    <sup>5</sup>Sichuan Academy of Natural Resource Sciences, Chengdu 610015, China

15    <sup>6</sup>U.S. Department of Agriculture-Agricultural Research Service, Robert W. Holley Center for  
16    Agriculture and Health, Ithaca, NY 14853, USA

17  
18    \*W.T., X.S., J.Y. and F.H. contributed equally to this work

19    \*Correspondence authors: Dr. Zhangjun Fei, email: [zf25@cornell.edu](mailto:zf25@cornell.edu) or Dr. Yongsheng Liu,  
20    email: [liuyongsheng1122@hfut.edu.cn](mailto:liuyongsheng1122@hfut.edu.cn)

1  
2  
3  
4 **22 Abstract**

5  
6 **23 Background:** Kiwifruit (*Actinidia* spp.) is a dioecious plant with fruits containing abundant  
7  
8  
9  
10  
11  
12  
13  
14  
15  
16  
17  
18  
19  
20  
21  
22  
23  
24  
25  
26  
27  
28  
29  
30  
31  
32  
33  
34  
35  
36  
37  
38  
39  
40  
41  
42  
43  
44  
45  
46  
47  
48  
49  
50  
51  
52  
53  
54  
55  
56  
57  
58  
59  
60  
61  
62  
63  
64  
65  
vitamin C and minerals. A handful of kiwifruit species have been domesticated, among which the  
*A. eriantha* is increasingly favored in breeding due to its superior commercial traits. Recently, elite  
cultivars from *A. eriantha* have been successfully selected and further studies on their biology and  
breeding potential require genomic information which is currently unavailable.

**28 Findings:** Here, we assembled a chromosome-scale genome sequence of *A. eriantha* cv. ‘White’  
29 using single-molecular sequencing and chromatin interaction map based scaffolding. The  
30 assembly has a total size of 690.6 Mb and an N50 of 21.7 Mb. Approximately 99% of the assembly  
31 were in 29 pseudomolecules corresponding to the 29 kiwifruit chromosomes. Forty-three percent  
32 of the *A. eriantha* genome are repetitive sequences, and the non-repetitive part encodes 42,988  
33 protein-coding genes, of which 39,075 have homologues from other plant species or protein  
34 domains. The divergence time between *A. eriantha* and its close relative *A. chinensis* is estimated  
35 to be 3.3 million years, and after diversification, 1,727 and 1,506 gene families are expanded or  
36 contracted in *A. eriantha*, respectively.

**37 Conclusions:** We provide a high-quality reference genome for kiwifruit *A. eriantha*. This  
38 chromosome-scale genome assembly is substantially better than two published kiwifruit  
39 assemblies from *A. chinensis* in terms of genome contiguity and completeness. The availability of  
40 *A. eriantha* genome provides a valuable resource for facilitating kiwifruit breeding and the studies  
41 of kiwifruit biology.

42  
43  
44  
45  
46  
47  
48  
49  
50  
51  
52  
53  
54  
55  
56  
57  
58  
59  
60  
61  
62  
63  
64  
65  
**43 Key words:** Kiwifruit; *Actinidia eriantha*; Genome assembly; single molecular sequencing; Hi-C

1  
2  
3  
4 45 **Data description**

5  
6 46 ***Introduction***

7  
8  
9 47 Kiwifruit is well known as the king of fruits due to its remarkably high vitamin C content and  
10  
11 48 abundant minerals [1, 2]. Native to China, kiwifruit belongs to the genus *Actinidia* which contains  
12  
13  
14 49 54 species and 75 taxa [3]. All species in this genus are perennial, deciduous and dioecious plants  
15  
16 50 with a climbing or scrambling growth habit, and they also have many common morphological  
17  
18  
19 51 features including the characteristic radiating arrangement of styles of female flower and the  
20  
21 52 structure of the fruit [4]. Despite rich germplasm resources in kiwifruit, only a few *Actinidia*  
22  
23  
24 53 species have been domesticated, such as *A. chinensis* var. *chinensis*, *A. chinensis* var. *deliciosa* and  
25  
26 54 *A. eriantha*, whose fruit size are close to commercial standard [5-7].  
27

28  
29 55 Owing to its strong resistance to *Pseudomonas syringae* pv. *Actinidiae*, long shelf-life,  
30  
31 56 enriched ascorbic acid and peelable skin [7-11], the *A. eriantha* (2n=58) has been favored in  
32  
33  
34 57 kiwifruit breeding. Recently, new cultivars have been selected either from the wild germplasm of  
35  
36 58 *A. eriantha* such as ‘White’ (Fig. 1) or from the interspecific hybridization between *A. eriantha*  
37  
38 59 (♂) and *A. chinensis* (♀) such as ‘Jinyan’ [7, 12]. The ‘White’ has particularly large fruits (96 g  
39  
40  
41 60 on average) with green flesh and favorable flavor and has been widely cultivated in China [7].  
42

43 61 *Actinidia eriantha* has also been used for genetic and genomic studies thanks to its high  
44  
45  
46 62 efficiency in genetic transformation and relatively short phase of juvenility [13]. The flowering  
47  
48  
49 63 and fruiting of *A. eriantha* can be accomplished within two years in green house conditions with a  
50  
51 64 low requirement for winter chilling [13]. In addition, roots of *A. eriantha* which contain many  
52  
53  
54 65 bioactive compounds such as triterpenes and polysaccharides are employed as a traditional  
55  
56 66 Chinese medicine for the treatment of gastric carcinoma, nasopharyngeal carcinoma, breast  
57  
58 67 carcinoma, and hepatitis [12, 14].  
59  
60  
61  
62  
63  
64  
65

1  
2  
3  
4 68 Previously, two kiwifruit genomes were published and both were from *A. chinensis*  
5  
6 69 ('Hongyang' and 'Red 5') [15, 16]. These short-read based assemblies are very fragmented,  
7  
8  
9 70 possibly due to the high complexity and heterozygosity of the kiwifruit genomes as well as  
10  
11 71 technical limitations. Here, we used single-molecular sequencing combined with the high-  
12  
13  
14 72 throughput chromosome conformation capture (Hi-C) technology to assemble the genome of the  
15  
16 73 elite kiwifruit cultivar 'White' of *A. eriantha*. The availability of this high-quality chromosome-  
17  
18  
19 74 scale genome sequence not only provides fundamental knowledge regarding kiwifruit biology but  
20  
21 75 also presents a valuable resource for kiwifruit breeding programs.  
22

### 23 24 76 25 26 77 ***Sample collection and genome sequencing***

27  
28 78 Fresh young leaves were collected from a female individual of *A. eriantha* cv. 'White'. High  
29  
30  
31 79 molecular weight (HMW) genomic DNA was extracted using the CTAB method as described in  
32  
33 80 the protocol ([https://www.pacb.com/wp-content/uploads/2015/09/Shared-Protocol-Preparing-](https://www.pacb.com/wp-content/uploads/2015/09/Shared-Protocol-Preparing-Arabidopsis-DNA-for-20-kb-SMRTbell-Libraries.pdf)  
34  
35 81 [Arabidopsis-DNA-for-20-kb-SMRTbell-Libraries.pdf](https://www.pacb.com/wp-content/uploads/2015/09/Shared-Protocol-Preparing-Arabidopsis-DNA-for-20-kb-SMRTbell-Libraries.pdf)). To construct genomic libraries  
36  
37  
38 82 (SMRTbell libraries) for PacBio long-read sequencing, HMW genomic DNA was sheared into  
39  
40  
41 83 fragments of approximately 20 kb using a Covaris g-Tube (KBiosciences p/n520079),  
42  
43 84 enzymatically repaired and converted to SMRTbell template following the Manufacturer's  
44  
45 85 instruction (DNA Template Prep Kit 1.0, PacBio p/n 100-259-100). The templates were size-  
46  
47  
48 86 selected using a BluePippin (SageScience, Inc.) to enrich large DNA fragments (> 10 kb) and then  
49  
50  
51 87 sequenced on a PacBio Sequel system. A total of 9 SMRT cells were sequenced, yielding  
52  
53 88 3,889,480 million reads with a mean and median length of 10,065 and 15,661 bp, respectively, and  
54  
55 89 a total of 39.1 Gb sequences, about 52.5× coverage of the kiwifruit genome with an estimated size  
56  
57  
58 90 of 745.3 Mb based on the flow cytometry analysis (Fig. S1; Table S1).  
59  
60  
61  
62  
63  
64  
65



1  
2  
3  
4  
5  
6  
7  
8  
9  
10  
11  
12  
13  
14  
15  
16  
17  
18  
19  
20  
21  
22  
23  
24  
25  
26  
27  
28  
29  
30  
31  
32  
33  
34  
35  
36  
37  
38  
39  
40  
41  
42  
43  
44  
45  
46  
47  
48  
49  
50  
51  
52  
53  
54  
55  
56  
57  
58  
59  
60  
61  
62  
63  
64  
65

91 Three paired-end Illumina libraries with insert sizes of 180, 220 and 500 bp, and seven  
92 mate-pair libraries with insert sizes of 3, 4, 5, 8, 10, 15, 17 kb, were prepared using Illumina’s  
93 Genomic DNA Sample Preparation kit and the Nextera Mate Pair Sample Preparation kit (Illumina,  
94 San Diego, CA), respectively. All libraries were sequenced on an Illumina HiSeq 2500 system,  
95 which yielded about 80.1 and 97.3 Gb of raw sequence data for paired-end and mate-pair libraries,  
96 respectively (Table S1). The raw Illumina paired-end reads were processed to remove duplications,  
97 adaptors and low-quality bases using Super-Deduper [17] and Trimmomatic [18] (v0.35), and the  
98 mate-pair reads were cleaned using NextClip [19] (v1.3.1) with default parameters. Finally, we  
99 obtained 76.6 and 46.2 Gb high-quality cleaned sequences for paired-end and mate-pair libraries,  
100 respectively (Table S1).

101 To construct the Hi-C library, ‘White’ plants were grown in a greenhouse, and  
102 approximately 4~6 grams young leaves were then harvested and subsequently fixed in the  
103 formaldehyde (1% v/v) for 10 min at room temperature. The fixation was terminated by adding  
104 glycine to a final concentration of 0.125M. The fixed samples were ground into powder in liquid  
105 nitrogen and then lysed with the addition of Triton X-100 to a concentration of 1% (v/v). The  
106 nuclei were isolated and prepared for Hi-C library construction according to a previously published  
107 protocol [20].

108  
109 ***Transcriptome sequencing***

110 To improve gene prediction, we generated transcriptome sequences from a pool of mixed tissues  
111 of ‘White’ including root, stem, leaf, flower, and fruits at 7, 30, 60, 90 and 120 days after anthesis.  
112 Total RNA was extracted from these tissues using an RNA extraction kit (BIOFIT, China), treated  
113 with DNase I and further purified with RNA clean kit (Promega, USA). RNA-Seq libraries were

1  
2  
3  
4  
5  
6  
7  
8  
9  
10  
11  
12  
13  
14  
15  
16  
17  
18  
19  
20  
21  
22  
23  
24  
25  
26  
27  
28  
29  
30  
31  
32  
33  
34  
35  
36  
37  
38  
39  
40  
41  
42  
43  
44  
45  
46  
47  
48  
49  
50  
51  
52  
53  
54  
55  
56  
57  
58  
59  
60  
61  
62  
63  
64  
65

114 constructed with the NEBNext® Ultra™ RNA Library Prep Kit (Illumina, USA), and sequenced  
115 on an Illumina HiSeq 2500 system using paired-end mode. A total of ~19.5 million raw read pairs  
116 were obtained, which were processed with Trimmomatic to remove adaptors. The cleaned reads  
117 were assembled *de novo* with Trinity [21] (version 2.4.0). Additionally, we also generated genome-  
118 guided assemblies with both Trinity and StringTie [22]. Different transcriptome assemblies were  
119 eventually integrated by PASA [23] (version 2.3.3) and used as transcript evidence during gene  
120 prediction process. Mapping of RNA-Seq reads to the genome assembly was performed with  
121 STAR [24] (version 020201), and read counting on the coding regions was performed with HTSeq  
122 [25] (version 0.6.0.).

123  
124 ***Chromosome-scale assembly of the A. eriantha genome***

125 *Actinidia eriantha* is a dioecious plant with a heterozygous diploid genome. We estimated the  
126 heterozygosity level through the k-mer spectrum analysis with GenomeScope [26] using sequences  
127 from the paired-end library with the insert size of 180 bp. The depth distribution of the derived 17-  
128 mers clearly showed two separate peaks, based on which we estimated the heterozygosity level of  
129 the *A. eriantha* cv. ‘White’ genome to be 1.21% (Fig. S1).

130 We then estimated the genome size of *A. eriantha* ‘White’ using the flow cytometry  
131 analysis, with tomato (*Solanum lycopersicum* cv. Ailsa Craig) used as the reference. We also  
132 performed flow cytometry analysis on *A. chinensis* cv. Hongyang. Approximately 1 g of young  
133 leaves were washed twice in distilled water and then chopped in ice-cold lysis buffer A (10 mmol/L  
134 MgSO<sub>4</sub>, 50 mmol/L KCl, 3.5 mmol/L HEPES pH 7.5, 0.3% (v/v) Triton x-100, 2% PVP 30  
135 (W/V)). After 5 minutes, the crude lysate was passed through a 75-µm pore size nylon mesh to  
136 remove large cellular debris. The filtrate (1 ml) was transferred to a 1.5 ml plastic tube and

1  
2  
3  
4  
5  
6  
7  
8  
9  
10  
11  
12  
13  
14  
15  
16  
17  
18  
19  
20  
21  
22  
23  
24  
25  
26  
27  
28  
29  
30  
31  
32  
33  
34  
35  
36  
37  
38  
39  
40  
41  
42  
43  
44  
45  
46  
47  
48  
49  
50  
51  
52  
53  
54  
55  
56  
57  
58  
59  
60  
61  
62  
63  
64  
65

centrifuged at 1000 rpm for 5 minutes. The supernatant was discarded, and the nuclei were then resuspended with lysis buffer B (10 mmol/L MgSO<sub>4</sub>, 50 mmol/L KCl, 3.5 mmol/L HEPES pH 7.5, 0.3% (v/v) Triton x-100, 0.4 mg/ml Propidium Iodide, 0.04 mg/ml RNase). After 15 minutes, samples were analyzed using a FACS Vantage SE flow cytometer (Becton-Dickinson, San José, USA). Four biological replicates were performed. Based on the 950-Mb genome of tomato, the genome size of ‘White’ was estimated to be 745.3±7.9 Mb, similar to the genome size of *A. chinensis* (Fig. S1) and consistent with that in a previous report (758 Mb; [27]).

We employed a strategy which took into account the unique advantage of different assemblers to construct the ‘White’ genome using PacBio long reads. First, PacBio long reads were corrected and assembled using the Canu program [28] (v1.7), which is a modularized pipeline consisting of three primary stages - read correction, trimming and assembly. The Canu-corrected reads were also assembled independently with the wtdbg program (<https://github.com/ruanjue/wtdbg>), a fast assembler for long noisy reads. Subsequently, the two independent assemblies (one with Canu and another with wtdbg) were merged by Quickmerge [29] (v0.2) to improve the contiguity. The merged assembly was further processed to correct errors using Pilon [30] (version 1.22) with high-quality cleaned Illumina reads from all paired-end and mate-pair libraries representing a total genome coverage of 171× (Table S1). This yielded 2,818,370 nucleotides, 2,495,388 insertions and 1,691,495 deletions being corrected. The resulting final assembled *A. eriantha* cv. ‘White’ genome contained 4,076 contigs with a N50 length of 539,246 bp and a cumulative size of 690,376,929 bp (Table 1). The contiguity and completeness of this assembly far exceeds that of two published kiwifruit *A. chinensis* genomes (Table 1).

160 Table 1 Assembly statistics

|                                            | <i>A. eriantha</i> | <i>A. chinensis</i> |              |
|--------------------------------------------|--------------------|---------------------|--------------|
|                                            | White              | Hongyang            | red5         |
| <b>Contigs</b>                             |                    |                     |              |
| Total contig number (#)                    | 4,076              | 26,721              | 39,868       |
| Total contig length (Mb)                   | 690.4              | 604.2               |              |
| Contig N50 (kb)                            | 539.2              | 58.9                |              |
| Contig N90 (kb)                            | 50.7               | 11.6                |              |
| Longest contig length (kb)                 | 3,260.20           | 423.5               |              |
| <b>Scaffolds</b>                           |                    |                     |              |
| Total scaffold number (#)                  | 1,735              | 7,698               | 3,887        |
| Total scaffold length (Mb)                 | 690.6              | 616.1               | 550.5        |
| Scaffold N50 (kb)                          | 23,583.9           | 646.8               | 623.8        |
| Scaffold N90 (kb)                          | 20,112.1           | 122.7               | 140.7        |
| Longest scaffold length (Mb)               | 28.6               | 3.4                 | 4.43         |
| Anchored to chromosome (Mb/%)              | 682.4 / 98.84      | 452.4 / 73.4        | 547.9 / 98.9 |
| Anchored with order and orientation (Mb/%) | 634.4 / 91.90      | 333.6 / 54.1        |              |

161

162 To scaffold the contigs based on chromatin interaction maps inferred from the Hi-C data,  
163 we first used HiC-Pro [31] to evaluate and filter the cleaned Hi-C reads. The Hi-C data usually  
164 contains a considerable part of invalid interaction read pairs which are non-informative and need  
165 to be filtered out beforehand. Among the 51 million read pairs that were uniquely aligned to the *A.*  
166 *eriantha* assembly, 33 million (64.1%) were valid interaction pairs and their insertion size spanned  
167 predominantly from dozens to hundreds of kilobases, therefore providing efficient information for  
168 scaffolding. As a part of error correction of the assembly, we used valid Hi-C reads to identify  
169 misassembled contigs. In principle, a genuine contig should display a continuous Hi-C interaction  
170 map whereas the discrete distribution of an interaction map likely indicates a misassembly. We  
171 examined the interaction map for each contig and broke 51 that were possibly misassembled.  
172 Subsequently, the corrected PacBio assembly was used for scaffolding with the LACHESIS  
173 program [32] and parameters “CLUSTER\_MIN\_RE\_SITES=48,  
174 CLUSTER\_MAX\_LINK\_DENSITY=2, CLUSTER\_NONINFORMATIVE\_RATIO=2,  
175 ORDER\_MIN\_N\_RES\_IN\_TRUN=14, ORDER\_MIN\_N\_RES\_IN\_SHREDS=15”. LACHESIS

1  
2  
3  
4 176 assigned 3,666 contigs with a total size of 682,355,494 bp (98.84% of the assembly) into 29 groups  
5  
6  
7 177 corresponding to the 29 kiwifruit chromosomes (Fig. 2 and 3a), among which 634,430,648 bp  
8  
9 178 (91.90%) had defined order and orientation (Table 1 and S2). The final chromosome-scale  
10  
11  
12 179 assembly had a total length of 690,781,529 bp and an N50 of 23,583,865 bp.  
13

### 14 180

#### 15 181 ***Evaluation of the genome assembly***

16  
17  
18  
19 182 We first evaluated the quality of the assembled *A. eriantha* ‘White’ genome by mapping Illumina  
20  
21 183 genomic and RNA-Seq reads to the assembly. Reads from the paired-end genomic library (with  
22  
23  
24 184 insert size of 180 bp) had very high mapping rate (98.7%), and the properly paired read mapping  
25  
26 185 rate was 92.0%. For the RNA-Seq reads, 91.7% could be mapped to the genome and 87.1% were  
27  
28  
29 186 uniquely mapped. The high mapping ratio of both genomic and RNA-Seq reads suggest a high  
30  
31 187 quality of the *A. eriantha* ‘White’ assembly.  
32

33  
34 188 We then identified synteny between the *A. eriantha* ‘White’ assembly and the assembly of  
35  
36 189 *A. chinensis* ‘red5’ using MUMMER [33] (version 4.0.0beta2). In general, the two assemblies  
37  
38 190 showed a high macro-collinearity, with only a few inconsistencies (Fig. 3b). Detailed check of the  
39  
40  
41 191 major inconsistent regions using genetic maps [34] and mate-pair read alignments confirmed the  
42  
43 192 high quality of the *A. eriantha* ‘White’ genome assembly, and particularly enabled us to discover  
44  
45 193 that in the ‘red5’ genome a ~8-Mb region was possibly misassembled into chromosome 23 (Fig.  
46  
47  
48 194 S2).  
49

#### 50 195

#### 51 196 ***Repeat annotation***

52  
53  
54  
55 197 Repeats were annotated following a protocol described in Campbell et al [35]. The customized  
56  
57  
58 198 repeat library was built to include both known and novel repeat families. We first searched the  
59  
60  
61  
62  
63  
64  
65

1  
2  
3  
4 199 assembly for miniature inverted transposable elements (MITEs) using MITE-Hunter [36] with  
5  
6  
7 200 default parameters. The long terminal repeat (LTR) retrotransposons were then identified from the  
8  
9 201 *A. eriantha* ‘White’ genome using LTRharvest and LTRdigest wrapped in the GenomeTools  
10  
11 202 package [37]. The LTR identification pipeline was run iteratively to collect both recent (sequence  
12  
13  
14 203 similarity  $\geq 99\%$ ) and old (sequence similarity  $\geq 85\%$ ) LTR retrotransposons. Candidates from each  
15  
16 204 run were filtered based on the elements typically encoded by LTR retrotransposons. The default  
17  
18  
19 205 parameters (-minlenltr 100 -maxlenltr 6000 -mindistltr 1500 -maxdistltr 25000 -mintsd 5 -maxtsd  
20  
21 206 5 -motif tgca) were used in LTR calling according to Campbell *et al.* [35]. An initial repeat  
22  
23  
24 207 masking of *A. eriantha* ‘White’ genome was performed with the repeat library derived by  
25  
26 208 combining the identified MITEs and LTR transposons. The repeat masked genome was fed to  
27  
28  
29 209 RepeatModeler (<http://www.repeatmasker.org/RepeatModeler/>) to identify novel repeat families.  
30  
31 210 Finally, all identified repeat sequences were combined and searched against a plant protein  
32  
33  
34 211 database where transposon encoding proteins were excluded. Elements with significant similarity  
35  
36 212 to plant genes were removed. The final repeat library contained 1,670 families, and 526 of them  
37  
38 213 were potentially novel repeat families. We used this species-specific repeat library to mask the *A.*  
39  
40  
41 214 *eriantha* ‘white’ genome. Approximately 43.3% of the *A. eriantha* ‘White’ genome was masked,  
42  
43 215 and the largest family of repeats was LTR transposons (Table S3). Repeat content identified in *A.*  
44  
45 216 *eriantha* ‘White’ was much higher than that in *A. chinensis* [e.g. 36% in Hongyang [15]], and this  
46  
47  
48 217 difference may be largely due to the improvement of the repeat region assembly with PacBio long  
49  
50  
51 218 reads. In addition, divergence between the two kiwifruit species could also contribute to this  
52  
53 219 difference.

54  
55 220  
56  
57  
58 221 ***Prediction and functional annotation of protein-coding genes***

1  
2  
3  
4 222 Protein-coding genes were predicted from the repeat-masked *A. eriantha* ‘White’ genome with the  
5  
6 223 MAKER-P program [35] (version 2.31.10), which integrates evidence from protein homology,  
7  
8  
9 224 transcripts and *ab initio* predictions. The homology-based evidence was derived by aligning  
10  
11 225 proteomes from 20 plant species to the ‘White’ genome assembly with exonerate (v2.26.1;  
12  
13  
14 226 <https://www.ebi.ac.uk/about/vertebrate-genomics/software/exonerate>). SNAP [38], AUGUSTUS  
15  
16 227 [39] (version 3.3), and GeneMark-ES [40] (version 4.35) were used for *ab initio* gene predictions.  
17  
18  
19 228 RNA-Seq data generated in this study were assembled *de novo* with Trinity and the assembled  
20  
21 229 contigs were aligned to the ‘White’ genome assembly to provide transcript evidence. Predictions  
22  
23  
24 230 supported by the three different sources of evidence were finally integrated by MAKER-P, which  
25  
26 231 resulted in a total of 52,514 primitive gene models. We then filtered and polished these gene  
27  
28  
29 232 models by two steps. First, we combined our RNA-Seq data with others collected from a previous  
30  
31 233 study [41], and mapped the reads to the ‘White’ genome using the STAR program [24], and a total  
32  
33 234 of 266 million read pairs were mapped. Based on the mapping, raw count for each predicted gene  
34  
35  
36 235 model was derived and then normalized to CPM (counts per million mapped read pairs). Gene  
37  
38 236 models with ultra-low expression (CPM < 0.1) were less likely to be real genes. Furthermore, we  
39  
40  
41 237 found that these lowly expressed genes had relatively high annotation edit distance (AED) score,  
42  
43 238 an indication of low-confidence as defined by MAKER-P program. Therefore, for gene models  
44  
45  
46 239 with CPM < 0.1, we only kept those containing both pfam domains and homologous sequences in  
47  
48 240 the NCBI nr protein database. After this filtering process 42,751 gene models were kept. Second,  
49  
50  
51 241 the predicted protein-coding genes of kiwifruit *A. chinensis* ‘red5’ have been manually curated  
52  
53 242 [16], and therefore these gene models should have relatively higher accuracy and could be used to  
54  
55 243 modify *A. eriantha* ‘White’ gene models whose predictions were not consistently supported by the  
56  
57  
58 244 different types of evidence. To this end, we performed another two *ab initio* predictions using  
59  
60  
61  
62  
63  
64  
65

1  
2  
3  
4 245 BRAKER [42] and GeMoMa [43] (version 1.5.2) with ‘red5’ proteome as the sole evidence. These  
5  
6 246 two predictions were compared with the gene models predicted by MAKER-P. Consequently, a  
7  
8  
9 247 total of 237 gene models not predicted by MAKER-P were added and another 415 gene models  
10  
11 248 which had better predictions by BRAKER2 or GeMoMa were used to replace the corresponding  
12  
13  
14 249 gene models predicted by MAKER-P. Finally, we obtained a total of 42,988 protein-coding genes  
15  
16 250 in the *A. eriantha* ‘White’ genome, with a mean coding sequence (CDS) size of 1,004 bp and  
17  
18  
19 251 containing an average of five exons.

20  
21 252 The predicted genes were functionally annotated by blasting their protein sequences against  
22  
23 253 TAIR [44], Swiss-Prot [45] and TrEMBL [46] databases with an E-value cutoff of 1e-5. Functional  
24  
25  
26 254 descriptions of the protein hits were assembled with the AHRD program  
27  
28  
29 255 (<https://github.com/groupschoof/AHRD>) and transferred to *A. eriantha* genes. Protein domains  
30  
31 256 were identified using InterProScan [47] (version 5.29-68.0) by searching the protein sequences  
32  
33 257 against domain databases including PANTHER [48], Pfam [49], SMART [50], and PROSITE [51].  
34  
35  
36 258 The Gene Ontology (GO) terms were assigned to the *A. eriantha* ‘White’ predicted genes using  
37  
38 259 the Blast2GO program [52] with entries from NCBI protein database and InterProScan.  
39  
40  
41 260 Collectively, 90.9% (N=39,075) of the predicted genes contain at least one annotation from the  
42  
43 261 above databases (Table S4).

44  
45  
46 262

### 47 48 263 ***Evolutionary and comparative genomic analysis***

49  
50 264 To infer the divergence time between *A. eriantha* and *A. chinensis*, we identified gene orthology  
51  
52  
53 265 between the two species using MCSanX [53] and calculated synonymous substitution rate (Ks)  
54  
55  
56 266 between each orthologous pair. Three additional species, cultivated tomato (*Solanum*  
57  
58 267 *lycopersicum*), wild tomato (*S. pennellii*) and potato (*S. tuberosum*), were also included in the  
59  
60  
61  
62  
63  
64  
65



1  
2  
3  
4 268 analysis. The Ks distribution (Fig. 4a) suggested that the divergence between the two kiwifruit  
5  
6 269 species was earlier than that between the two tomato species. We dated the divergence by assuming  
7  
8  
9 270 a strict molecular clock [54], and the time when *A. eriantha* and *A. chinensis* separated was  
10  
11 271 estimated to be ~3.3 million years ago (Mya), compared to ~1.9 Mya between *S. lycopersicum* and  
12  
13  
14 272 *S. penellii* and ~6.0 Mya between *S. lycopersicum* and *S. tuberosum*. Gene family evolution was  
15  
16 273 analyzed by comparing genomes of *A. eriantha*, *A. chinensis*, *S. lycopersicum*, *S. tuberosum*, *Vitis*  
17  
18  
19 274 *vinifera*, *Arabidopsis thaliana* and *Oryza sativa*. A total of 17,593 orthogroups were defined by  
20  
21 275 OrthoFinder [55] (version 2.2.6) and among which 1,246 were single-copy gene families (Fig. 4b).  
22  
23  
24 276 The single-copy family genes were aligned and concatenated to build a species phylogenetic tree  
25  
26 277 using IQ-TREE [56] (version 1.5.5) with a best-fitting model (Fig. 4c). Gene family  
27  
28  
29 278 expansion/contraction along the branches of the phylogenetic tree was analyzed by CAFÉ [57]  
30  
31 279 (version 4.1). Finally, a total of 1,727 and 1,506 gene families were found apparently expanded  
32  
33 280 and contracted, respectively, in *A. eriantha* (Fig. 4c).  
34  
35  
36 281

## 37 38 282 **Conclusion**

39  
40 283 Here, we report a high-quality reference genome of kiwifruit *A. eriantha* cv. ‘White’. The assembly  
41  
42  
43 284 from single-molecular sequencing combined with Hi-C scaffolding yielded a highly continuous  
44  
45  
46 285 and complete genome than the two previously published kiwifruit genomes. This genome will  
47  
48 286 provide a valuable source for exploration of genetic basis of unique traits in kiwifruit and also  
49  
50 287 facilitate the studying of sexual determination loci in the dioecious plants.  
51  
52

## 53 288 54 55 289 **Availability of supporting data**

1  
2  
3  
4  
5  
6  
7  
8  
9  
10  
11  
12  
13  
14  
15  
16  
17  
18  
19  
20  
21  
22  
23  
24  
25  
26  
27  
28  
29  
30  
31  
32  
33  
34  
35  
36  
37  
38  
39  
40  
41  
42  
43  
44  
45  
46  
47  
48  
49  
50  
51  
52  
53  
54  
55  
56  
57  
58  
59  
60  
61  
62  
63  
64  
65

290 This Whole Genome Shotgun project has been deposited at DBJ/ENA/GenBank under the  
291 accession QOVS000000000. The version described in this paper is version QOVS01000000. Raw  
292 sequencing reads have been deposited in the Sequence Read Archive (SRA) database under the  
293 accession number SRP155011. *The Actinidia eriantha ‘White’ genome sequence and the*  
294 *annotation are also available via the GigaScience database, GigaDB [58]. Detailed protocols of*  
295 *computational analyses have been deposited in protocols.io [59].*

297 **Competing interests**

298 The authors have no competing interests to declare.

300 **Abbreviation**

- 301 Blast: Basic Local Alignment Search Tool;
- 302 CTAB: Cetyl trimethylammonium bromide;
- 303 NCBI: National Center for Biotechnology Information;
- 304 RNA-Seq: RNA sequencing;
- 305 PacBio: Pacific Biosciences;
- 306 SMRT: Single Molecule Real-Time;
- 307 Mb: megabase;
- 308 Gb: gigabase

310 **Acknowledgement**

311 This work was supported by grants from the National Natural Science Foundation of China  
312 (31471157 and 31700266), National Foundation for Germplasm Repository of Special

1  
2  
3  
4  
5  
6  
7  
8  
9  
10  
11  
12  
13  
14  
15  
16  
17  
18  
19  
20  
21  
22  
23  
24  
25  
26  
27  
28  
29  
30  
31  
32  
33  
34  
35  
36  
37  
38  
39  
40  
41  
42  
43  
44  
45  
46  
47  
48  
49  
50  
51  
52  
53  
54  
55  
56  
57  
58  
59  
60  
61  
62  
63  
64  
65

313 Horticultural Crops in Central Mountain Areas of China (NJF2017-69), National Science Fund for  
314 Distinguished Young Scholars (30825030), Key Project from the Government of Sichuan Province  
315 (2013NZ0014, 2016NZ0105), Key Project from the Government of Anhui Province  
316 (2012AKKG0739;1808085MC57), and the US National Science Foundation (IOS-1339287 and  
317 IOS-1539831).

**Author contribution**

320 W.T., X.S. and J.Y. contributed equally to this work. W.T., J.Y., X.T., Y.Y., X.N., M.M., D.Z.,  
321 S.H., W.S., C.F. and M.L. collected plant samples, extracted DNA/RNA, and performed  
322 transcriptome sequencing and gene expression analyses; W.T., X.S., J.Y., X.T., C.J., Z.F. and Y.L.  
323 performed DNA sequencing, genome assembly, gene annotation, evolution and comparative  
324 genomic analyses, and website construction; X.S., W.T., Z.F. and Y.L. wrote and revised the  
325 manuscript; Y.L. and Z.F. conceived strategies, designed experiments and managed projects. All  
326 authors read and approved the manuscript.

**Figure legends**

330 **Figure 1.** Tree and fruits of *A. eriantha* cv. ‘White’.

332 **Figure 2.** Chromatin interaction map of *A. eriantha* derived from Hi-C data. Each group represents  
333 an individual chromosome.

1  
2  
3  
4  
5  
6  
7  
8  
9  
10  
11  
12  
13  
14  
15  
16  
17  
18  
19  
20  
21  
22  
23  
24  
25  
26  
27  
28  
29  
30  
31  
32  
33  
34  
35  
36  
37  
38  
39  
40  
41  
42  
43  
44  
45  
46  
47  
48  
49  
50  
51  
52  
53  
54  
55  
56  
57  
58  
59  
60  
61  
62  
63  
64  
65

**Figure 3.** Genome of *A. eriantha* and synteny between the two kiwifruit species. (a) Genome landscape of *A. eriantha* cv. ‘White’. Track A: gene density, Track B: repeat density, Track C: GC content; all were calculated in a 500-kb window; (b) Genome synteny between *A. eriantha* cv. ‘White’ and *A. chinensis* ‘red5’.

**Figure 4.** Evolutionary and comparative genomic analyses. (a) Distribution of synonymous substitution rate (Ks) between *A. eriantha* and *A. chinensis*, *S. lycopersicum* and *S. penellii*, and *S. lycopersicum* and *S. tuberosum*; (b) Orthogroups shared by selected species; (c) Species phylogenetic tree and gene family evolution. Numbers on the branch indicate counts of gene family that under either expansion (red) or contraction (green).

**Figure S1.** Genome characteristics of *A. eriantha* and *A. chinensis*. (a) Flow cytometry analyses of *A. eriantha* cv. White and *A. chinensis* cv. Hongyang. The main peak (I) indicates G0/G1 cells and the secondary peak (II) represents G2/M cells. (b) Flow cytometry analyses of *A. eriantha* ‘White’ and *Solanum lycopersicum* cv. Ailsa Craig. Peaks a and b represent the G0/G1 cells of “White” and ‘Ailsa Craig’, respectively. The genome size of ‘White’ was estimated to be 745.3±7.9 Mb using ‘Ailsa Craig’ as the reference. (c) 17-mer distribution of ‘White’ genomic reads (180bp paired-end library).

**Figure S2.** Examination of assembly inconsistencies between *A. eriantha* cv. ‘White’ and *A. chinensis* cv. ‘red5’. (a) Validation of genome assembly of ‘White’ using genetic maps. Horizontal lines within “White” chromosomes indicate gapped regions and lines between chromosomes of two assemblies indicate syntenic regions. (b) A chromosomal segment assembled into the Chr23

1  
2  
3  
4  
5  
6  
7  
8  
9  
10  
11  
12  
13  
14  
15  
16  
17  
18  
19  
20  
21  
22  
23  
24  
25  
26  
27  
28  
29  
30  
31  
32  
33  
34  
35  
36  
37  
38  
39  
40  
41  
42  
43  
44  
45  
46  
47  
48  
49  
50  
51  
52  
53  
54  
55  
56  
57  
58  
59  
60  
61  
62  
63  
64  
65

358 in *A. chinensis* “red5”, is syntenic to the region located at the terminus of Chr19 in *A. eriantha*  
359 cv. ‘White’. (c) Snapshots of Illumina mate-pair reads mapped to the junctions of the break point  
360 as well as nearby regions supporting the assembly of ‘White’.

361

## Reference

1. Ferguson AR, Ferguson LR. Are kiwifruit really good for you? *Acta Hort* 2013;**610**:131-138
2. Richardson DP, Ansell J, Drummond LN. The nutritional and health attributes of kiwifruit: a review. *Eur J Nutr* 2018;1-18.
3. Li JQ, Li XW, Soejarto DD. Actinidiaceae. In: Wu ZY, Raven PH, Hong DY, eds. *Flora of China*. Beijing: Science Press & St. Louis: Missouri Plant Garden Press; 2007;**12**:pp334-362.
4. Ferguson AR, Huang H. Genetic resources of kiwifruit: domestication and breeding. *Hortic Rev*. 2007;**33**:1-121.
5. Testolin R. Kiwifruit (*Actinidia* spp.) in Italy: The history of the industry, international scientific cooperation and recent advances in genetics and breeding. *ISHS Acta Horticulturae* 2015;47-61.
6. Jo YS, Cho HS, Park MY, Bang GP. Selection of a sweet *Actinidia eriantha* 'bidan'. *ISHS Acta Horticulturae* 2017; 253-258.
7. Wu Y, Xie M, Zhang Q et al. Characteristics of 'White': a new easy-peel cultivar of *Actinidia eriantha*. *N Z J Crop Hortic Sci* 2009;**37**(4):369-373.
8. Atkinson RG, Sharma NN, Hallett IC et al. *Actinidia eriantha*: a parental species for breeding kiwifruit with novel peelability and health attributes. *N Z J For Sci* 2009;**39**:207-216.
9. Guo R, Landis JB, Moore MJ et al. Development and application of transcriptome-derived microsatellites in *Actinidia eriantha* (Actinidiaceae). *Front Plant Sci* 2017;**8**:1383.
10. Prakash R, Hallett IC, Wong SF et al. Cell separation in kiwifruit without development of a specialised detachment zone. *BMC Plant Biol*. 2017;**17**(1):86.
11. Shi ZJ, Zhang HQ, Hui Q et al. The resistance evaluation of different kiwifruit varieties to canker. *Acta Agriculturae Zhejiangensis* 2014;**26**(3):752-759
12. Zhang D, Gao C, Li R et al. TEOA, a triterpenoid from *Actinidia eriantha*, induces autophagy in SW620 cells via endoplasmic reticulum stress and ROS-dependent mitophagy. *Arch Pharm Res* 2017;**40**(5):579-591.
13. Wang T, Ran Y, Atkinson RG et al. Transformation of *Actinidia eriantha*: a potential species for functional genomics studies in Actinidia. *Plant Cell Rep*. 2006;**25**(5):425-431.
14. Wu JG, Ma L, Lin SH et al. Anticancer and anti-angiogenic activities of extract from *Actinidia eriantha* Benth root. *J Ethnopharmacol* 2017;**203**:1-10.
15. Huang S, Ding J, Deng D et al. Draft genome of the kiwifruit *Actinidia chinensis*. *Nat Commun* 2013;**4**:2640.
16. Pilkington SM, Crowhurst R, Hilario E et al. A manually annotated *Actinidia chinensis* var. *chinensis* (kiwifruit) genome highlights the challenges associated with draft genomes and gene prediction in plants. *BMC Genomics* 2018;**19**(1):257.
17. Petersen KR, Streett DA, Gerritsen AT et al. Super deduper, fast PCR duplicate detection in fastq files. *ACM* 2015;491-492.
18. Bolger AM, Lohse M, Usadel B. Trimmomatic: a flexible trimmer for Illumina sequence data. *Bioinformatics* 2014;**30**:2114-20.
19. Leggett RM, Clavijo BJ, Clissold L et al. NextClip: an analysis and read preparation tool for Nextera Long Mate Pair libraries. *Bioinformatics* 2013;**30**(4):566-568.
20. Rao SS, Huntley MH, Durand NC et al. A 3D map of the human genome at kilobase resolution reveals principles of chromatin looping. *Cell* 2014;**159**(7):1665-1680.
21. Haas BJ, Papanicolaou A, Yassour M et al. De novo transcript sequence reconstruction from RNA-seq using the Trinity platform for reference generation and analysis. *Nat Protoc* 2013;**8**(8):1494.
22. Pertea M, Pertea GM, Antonescu CM et al. StringTie enables improved reconstruction of a transcriptome from RNA-seq reads. *Nat Biotechnol* 2015;**33**(3):290-295.
23. Haas BJ, Delcher AL, Mount SM et al. Improving the Arabidopsis genome annotation using maximal transcript alignment assemblies. *Nucleic Acids Res* 2003;**31**(19):5654-5666.
24. Dobin A, Davis CA, Schlesinger F et al. STAR: ultrafast universal RNA-seq aligner. *Bioinformatics* 2013;**29**(1):15-21.

- 1  
2  
3  
4 412 25. Anders S, Pyl PT, Huber W. HTSeq—a Python framework to work with high-throughput  
5 413 sequencing data. *Bioinformatics* 2015;**31**(2):166-169.
- 6 414 26. Vurture GW, Sedlazeck FJ, Nattestad M et al. GenomeScope: fast reference-free genome profiling  
7 415 from short reads. *Bioinformatics* 2017;**33**(14):2202-2204.
- 8 416 27. Hopping ME. Flow cytometric analysis of *Actinidia* species. *N Z J Bot* 1994;**32**(1):85-93.
- 9 417 28. Koren S, Walenz BP, Berlin K et al. Canu: scalable and accurate long-read assembly via adaptive  
10 418 k-mer weighting and repeat separation. *Genome Res* 2017;**27**(5):722-736.
- 11 419 29. Chakraborty M, Baldwin-Brown JG, Long AD et al. Contiguous and accurate de novo assembly of  
12 420 metazoan genomes with modest long read coverage. *Nucleic Acids Res* 2016;**44**(19):e147.
- 13 421 30. Walker BJ, Abeel T, Shea T et al. Pilon: an integrated tool for comprehensive microbial variant  
14 422 detection and genome assembly improvement. *PloS One* 2014;**9**(11):e112963.
- 15 423 31. Servant N, Varoquaux N, Lajoie BR et al. HiC-Pro: an optimized and flexible pipeline for Hi-C  
16 424 data processing. *Genome Biol* 2015;**16**(1):259.
- 17 425 32. Burton JN, Adey A, Patwardhan RP et al. Chromosome-scale scaffolding of de novo genome  
18 426 assemblies based on chromatin interactions. *Nat Biotechnol* 2013;**31**(12):1119.
- 19 427 33. Kurtz S, Phillippy A, Delcher AL et al. Versatile and open software for comparing large genomes.  
20 428 *Genome Biol* 2004;**5**(2):R12.
- 21 429 34. Zhang Q, Liu C, Liu Y et al. 2015. High-density interspecific genetic maps of kiwifruit and the  
22 430 identification of sex-specific markers. *DNA Res* 2015;**22**(5):367-375.
- 23 431 35. Campbell M, Law M, Holt C et al. MAKER-P: a tool-kit for the rapid creation, management, and  
24 432 quality control of plant genome annotations. *Plant Physiol* 2013;**164**(2):513-524.
- 25 433 36. Han Y, Wessler SR. MITE-Hunter: a program for discovering miniature inverted-repeat  
26 434 transposable elements from genomic sequences. *Nucleic Acids Res* 2010;**38**(22):e199.
- 27 435 37. Gremme G, Steinbiss S, Kurtz S. GenomeTools: a comprehensive software library for efficient  
28 436 processing of structured genome annotations. *IEEE/ACM Trans Comput Biol Bioinform*  
29 437 2013;**10**(3):645-656.
- 30 438 38. Korf I. Gene finding in novel genomes. *BMC Bioinformatics* 2004;**5**(1):59.
- 31 439 39. Stanke M, Keller O, Gunduz I et al. AUGUSTUS: ab initio prediction of alternative transcripts.  
32 440 *Nucleic Acids Res.* 2006;**34**:W435-W439.
- 33 441 40. Lomsadze A, Ter-Hovhannisyan V, Chernoff YO et al. Gene identification in novel eukaryotic  
34 442 genomes by self-training algorithm. *Nucleic Acids Res* 2005;**33**(20):6494-6506.
- 35 443 41. Wang Z, Liu Y, Li D et al. Identification of circular RNAs in kiwifruit and their species-specific  
36 444 response to bacterial canker pathogen invasion. *Front Plant Sci.* 2017;**8**:413.
- 37 445 42. Hoff KJ, Lange S, Lomsadze A et al. BRAKER1: Unsupervised RNA-Seq-Based Genome  
38 446 Annotation with GeneMark-ET and AUGUSTUS. *Bioinformatics* 2016;**32**(5):767-769.
- 39 447 43. Keilwagen J, Wenk M, Erickson JL et al. Using intron position conservation for homology-based  
40 448 gene prediction. *Nucleic Acids Res* 2016;**44**(9):e89.
- 41 449 44. Rhee SY, Beavis W, Berardini TZ et al. The Arabidopsis Information Resource (TAIR): a model  
42 450 organism database providing a centralized, curated gateway to Arabidopsis biology, research  
43 451 materials and community. *Nucleic Acids Res* 2003;**31**(1):224-228.
- 44 452 45. Bairoch A, Boeckmann B. The SWISS-PROT protein sequence data bank. *Nucleic Acids Res*  
45 453 1991;**19**(Suppl):2247-2249.
- 46 454 46. Bairoch A, Apweiler R. The SWISS-PROT protein sequence data bank and its supplement  
47 455 TrEMBL. *Nucleic Acids Res* 1997;**25**(1):31-36.
- 48 456 47. Zdobnov EM, Apweiler R. InterProScan—an integration platform for the signature-recognition  
49 457 methods in InterPro. *Bioinformatics* 2001;**17**(9):847-848.
- 50 458 48. Mi H, Lazareva-Ulitsky B, Loo R et al. The PANTHER database of protein families, subfamilies,  
51 459 functions and pathways. *Nucleic Acids Res* 2005;**33**(Suppl):D284-D288.
- 52 460 49. Finn RD, Bateman A, Clements J et al. Pfam: the protein families database. *Nucleic Acids Res*  
53 461 2014;**42**(Database issue):D222-D230.

1  
2  
3  
4  
5  
6  
7  
8  
9  
10  
11  
12  
13  
14  
15  
16  
17  
18  
19  
20  
21  
22  
23  
24  
25  
26  
27  
28  
29  
30  
31  
32  
33  
34  
35  
36  
37  
38  
39  
40  
41  
42  
43  
44  
45  
46  
47  
48  
49  
50  
51  
52  
53  
54  
55  
56  
57  
58  
59  
60  
61  
62  
63  
64  
65

50. Schultz J, Copley RR, Doerks T et al. SMART: a web-based tool for the study of genetically mobile domains. *Nucleic Acids Res* 2000;**28**(1):231-234.

51. Bairoch A. PROSITE: a dictionary of sites and patterns in proteins. *Nucleic Acids Res* 1991;**19**(Suppl):2241-2245.

52. Conesa A, Götz S. Blast2GO: A comprehensive suite for functional analysis in plant genomics. *Int J Plant Genomics* 2008;**2008**:619832.

53. Wang Y, Tang H, DeBarry JD et al. MCScanX: a toolkit for detection and evolutionary analysis of gene synteny and collinearity. *Nucleic Acids Res* 2012;**40**(7):e49.

54. Ossowski S, Schneeberger K, Lucas-Lledó JI et al. The rate and molecular spectrum of spontaneous mutations in *Arabidopsis thaliana*. *Science* 2010;**327**(5961):92-94.

55. Emms DM, Kelly S. OrthoFinder: solving fundamental biases in whole genome comparisons dramatically improves orthogroup inference accuracy. *Genome Biol* 2015;**16**(1):157.

56. Nguyen LT, Schmidt HA, von Haeseler A et al. IQ-TREE: a fast and effective stochastic algorithm for estimating maximum-likelihood phylogenies. *Mol Biol Evol* 2014;**32**(1):268-74.

57. De Bie T, Cristianini N, Demuth JP et al. CAFE: a computational tool for the study of gene family evolution. *Bioinformatics* 2006;**22**(10):1269-71.

58. Tang W, Sun X, Yue J et al. Supporting data for “Chromosome-scale genome assembly of kiwifruit *Actinidia eriantha* with single-molecule sequencing and chromatin interaction mapping.” *GigaScience Database* 2019.

59. Tang W, Sun X, Yue J et al. Protocols for “Chromosome-scale genome assembly of kiwifruit *Actinidia eriantha* with single-molecule sequencing and chromatin interaction mapping.” *protocols.io* 2019. <http://dx.doi.org/10.17504/protocols.io.vgse3we>.



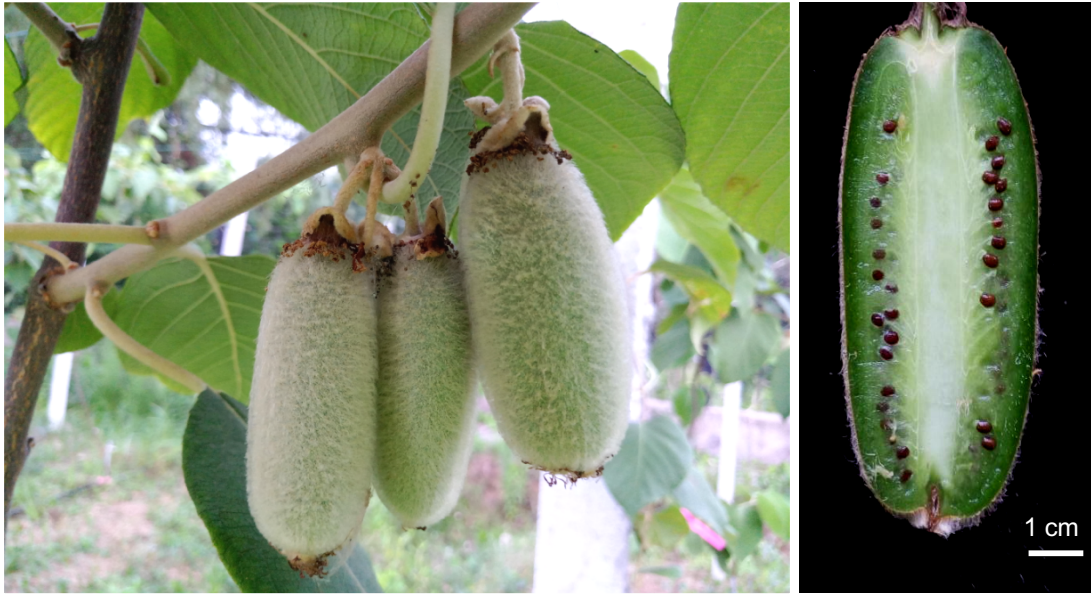

**Figure 1**

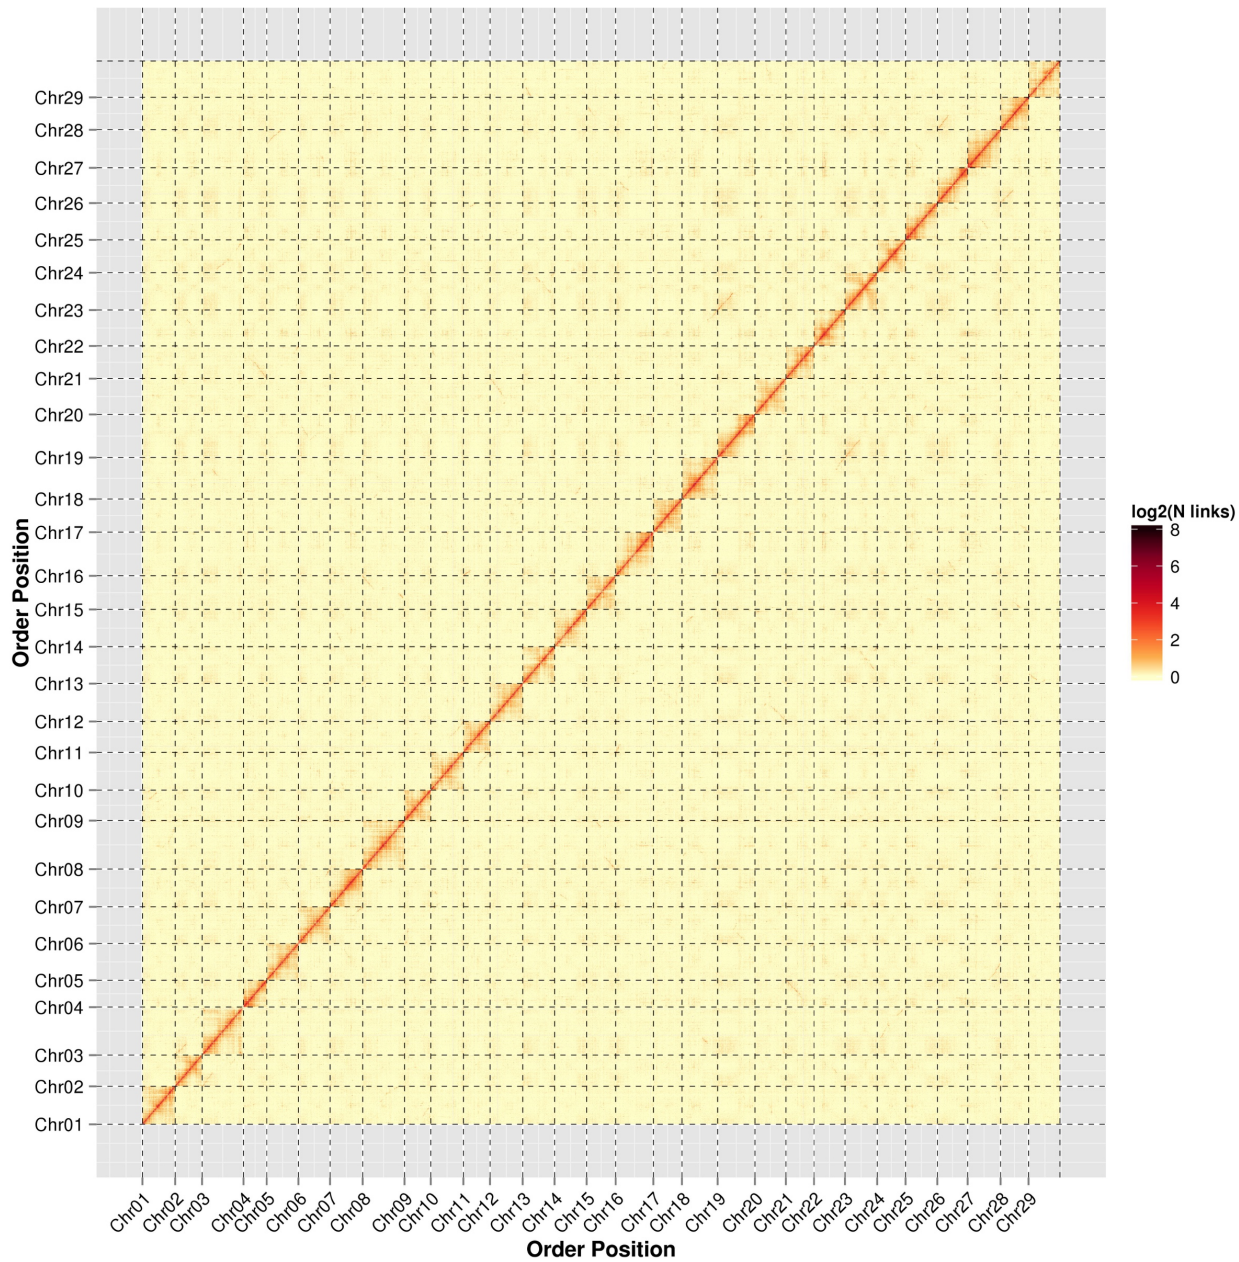

Figure 2.

a

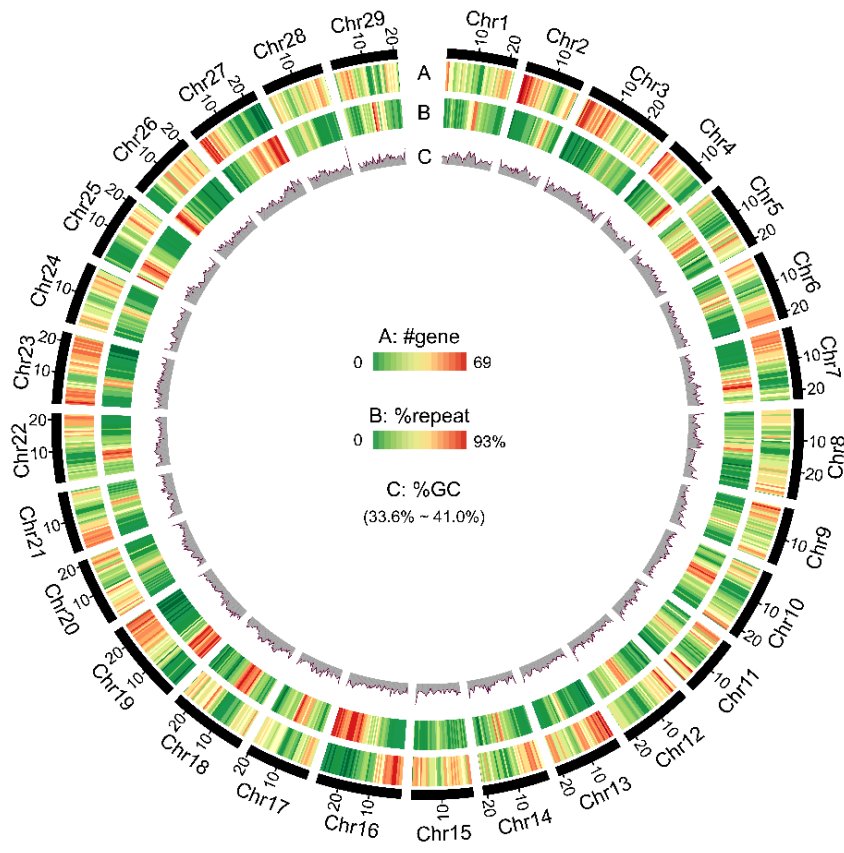

b

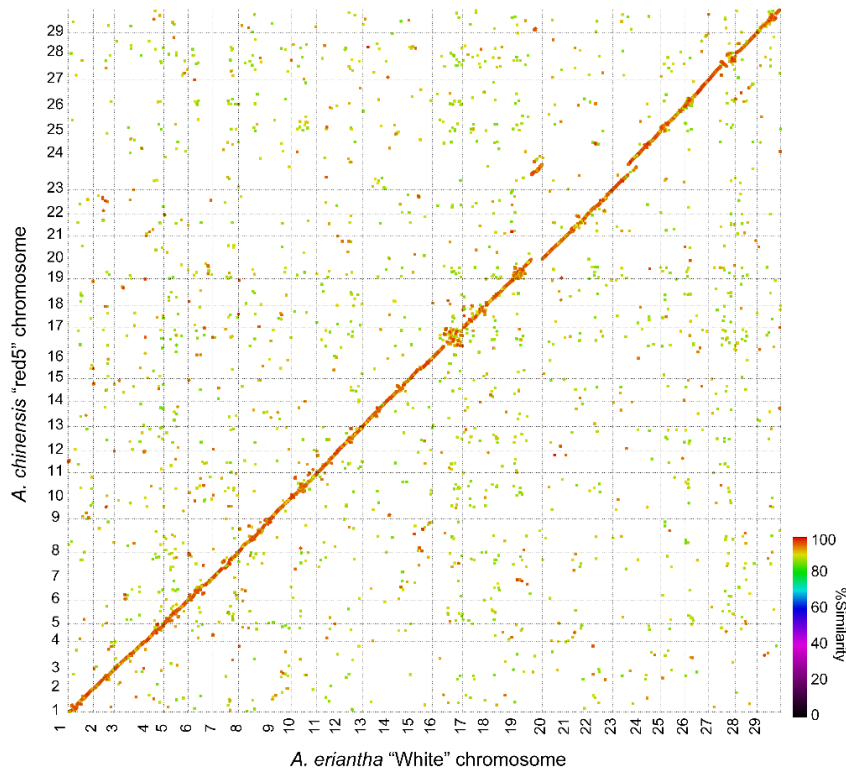

Figure 3

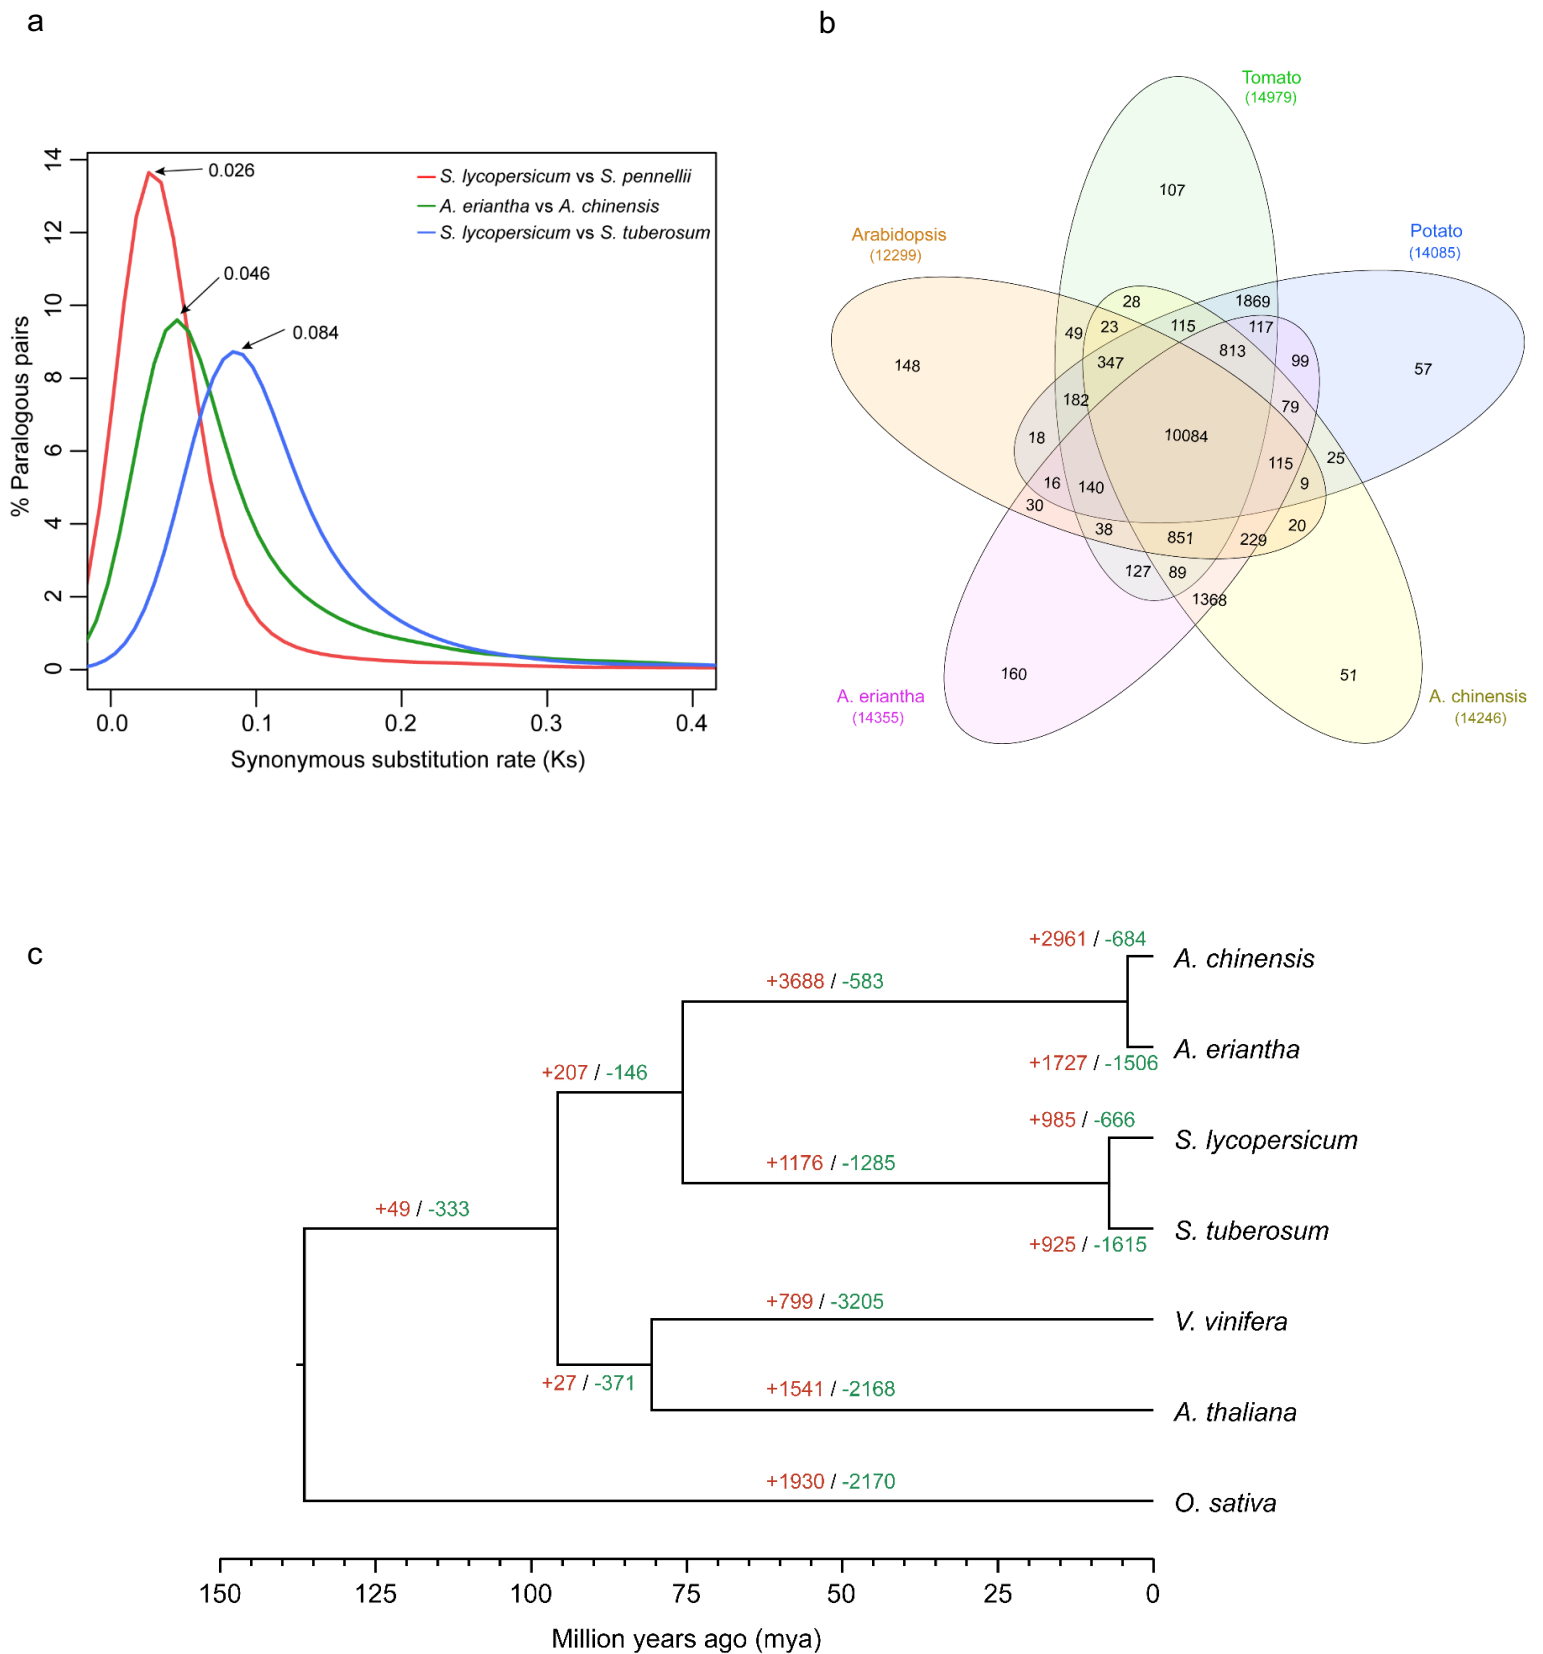

Figure 4



Click here to access/download  
**Supplementary Material**  
Supp\_Figures.pdf



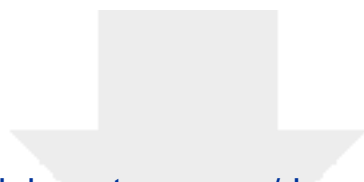

Click here to access/download  
**Supplementary Material**  
Supp\_Tables.xlsx

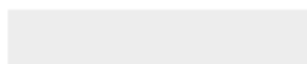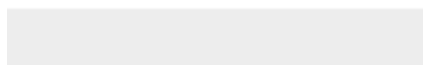

February 8, 2019

Dear Dr. Scott Edmunds:

Thank you for your time and effort in handling our manuscript titled “Chromosome-scale genome assembly of kiwifruit *Actinidia eriantha* with single-molecule sequencing and chromatin conformation capture” (manuscript reference number: GIGA-D-18-00282R3).

We have attached our detailed responses to the specific comments of the editor and the reviewer. We hope that we have addressed all the concerns and this revised manuscript is suitable for publication in GigaScience.

Sincerely,

Zhangjun Fei
