# Supplementary material for: Chromosome-scale genome assembly of kiwifruit Actinidia eriantha with single-molecule sequencing and chromatin interaction mapping
Source: PubMed Central journal article supplement (PMC6446220; doi:10.1093/gigascience/giz027), 2019-04-03
Supplement: giz027_giga-d-18-00282_revision_4.pdf [file giz027_giga-d-18-00282_revision_4.pdf]

# GigaScience

## Chromosome-scale genome assembly of kiwifruit *Actinidia eriantha* with single-molecule sequencing and chromatin conformation capture --Manuscript Draft--

|                                                      |                                                                                                                                                                                                                                                                                                                                                                                                                                                                                                                                                                                                                                                                                                                                                                                                                                                                                                                                                                                                                                                                                                                                                                                                                                                                                                                                                                                                                                                                                                                                                                                                                                                                                                                                                                                                                 |                   |
|------------------------------------------------------|-----------------------------------------------------------------------------------------------------------------------------------------------------------------------------------------------------------------------------------------------------------------------------------------------------------------------------------------------------------------------------------------------------------------------------------------------------------------------------------------------------------------------------------------------------------------------------------------------------------------------------------------------------------------------------------------------------------------------------------------------------------------------------------------------------------------------------------------------------------------------------------------------------------------------------------------------------------------------------------------------------------------------------------------------------------------------------------------------------------------------------------------------------------------------------------------------------------------------------------------------------------------------------------------------------------------------------------------------------------------------------------------------------------------------------------------------------------------------------------------------------------------------------------------------------------------------------------------------------------------------------------------------------------------------------------------------------------------------------------------------------------------------------------------------------------------|-------------------|
| <b>Manuscript Number:</b>                            | GIGA-D-18-00282R4                                                                                                                                                                                                                                                                                                                                                                                                                                                                                                                                                                                                                                                                                                                                                                                                                                                                                                                                                                                                                                                                                                                                                                                                                                                                                                                                                                                                                                                                                                                                                                                                                                                                                                                                                                                               |                   |
| <b>Full Title:</b>                                   | Chromosome-scale genome assembly of kiwifruit <i>Actinidia eriantha</i> with single-molecule sequencing and chromatin conformation capture                                                                                                                                                                                                                                                                                                                                                                                                                                                                                                                                                                                                                                                                                                                                                                                                                                                                                                                                                                                                                                                                                                                                                                                                                                                                                                                                                                                                                                                                                                                                                                                                                                                                      |                   |
| <b>Article Type:</b>                                 | Data Note                                                                                                                                                                                                                                                                                                                                                                                                                                                                                                                                                                                                                                                                                                                                                                                                                                                                                                                                                                                                                                                                                                                                                                                                                                                                                                                                                                                                                                                                                                                                                                                                                                                                                                                                                                                                       |                   |
| <b>Funding Information:</b>                          | National Natural Science Foundation of China (31471157)                                                                                                                                                                                                                                                                                                                                                                                                                                                                                                                                                                                                                                                                                                                                                                                                                                                                                                                                                                                                                                                                                                                                                                                                                                                                                                                                                                                                                                                                                                                                                                                                                                                                                                                                                         | Dr. Yongsheng Liu |
|                                                      | National Science Foundation (IOS-1339287)                                                                                                                                                                                                                                                                                                                                                                                                                                                                                                                                                                                                                                                                                                                                                                                                                                                                                                                                                                                                                                                                                                                                                                                                                                                                                                                                                                                                                                                                                                                                                                                                                                                                                                                                                                       | Dr. Zhangjun Fei  |
| <b>Abstract:</b>                                     | <p>Background: Kiwifruit (<i>Actinidia</i> spp.) is a dioecious plant with fruits containing abundant vitamin C and minerals. A handful of kiwifruit species have been domesticated, among which the <i>A. eriantha</i> is increasingly favored in breeding due to its superior commercial traits. Recently, elite cultivars from <i>A. eriantha</i> have been successfully selected and further studies on their biology and breeding potential require genomic information which is currently unavailable.</p> <p>Findings: Here, we assembled a chromosome-scale genome sequence of <i>A. eriantha</i> cv. White using single-molecular sequencing and chromatin interaction map-based scaffolding. The assembly has a total size of 690.6 Mb and an N50 of 21.7 Mb. Approximately 99% of the assembly were in 29 pseudomolecules corresponding to the 29 kiwifruit chromosomes. Forty-three percent of the <i>A. eriantha</i> genome are repetitive sequences, and the non-repetitive part encodes 42,988 protein-coding genes, of which 39,075 have homologues from other plant species or protein domains. The divergence time between <i>A. eriantha</i> and its close relative <i>A. chinensis</i> is estimated to be 3.3 million years, and after diversification, 1,727 and 1,506 gene families are expanded and contracted in <i>A. eriantha</i>, respectively.</p> <p>Conclusions: We provide a high-quality reference genome for kiwifruit <i>A. eriantha</i>. This chromosome-scale genome assembly is substantially better than two published kiwifruit assemblies from <i>A. chinensis</i> in terms of genome contiguity and completeness. The availability of <i>A. eriantha</i> genome provides a valuable resource for facilitating kiwifruit breeding and studies of kiwifruit biology.</p> |                   |
| <b>Corresponding Author:</b>                         | Zhangjun Fei<br>Boyce Thompson Institute for Plant Research<br>Ithaca, NY UNITED STATES                                                                                                                                                                                                                                                                                                                                                                                                                                                                                                                                                                                                                                                                                                                                                                                                                                                                                                                                                                                                                                                                                                                                                                                                                                                                                                                                                                                                                                                                                                                                                                                                                                                                                                                         |                   |
| <b>Corresponding Author Secondary Information:</b>   |                                                                                                                                                                                                                                                                                                                                                                                                                                                                                                                                                                                                                                                                                                                                                                                                                                                                                                                                                                                                                                                                                                                                                                                                                                                                                                                                                                                                                                                                                                                                                                                                                                                                                                                                                                                                                 |                   |
| <b>Corresponding Author's Institution:</b>           | Boyce Thompson Institute for Plant Research                                                                                                                                                                                                                                                                                                                                                                                                                                                                                                                                                                                                                                                                                                                                                                                                                                                                                                                                                                                                                                                                                                                                                                                                                                                                                                                                                                                                                                                                                                                                                                                                                                                                                                                                                                     |                   |
| <b>Corresponding Author's Secondary Institution:</b> |                                                                                                                                                                                                                                                                                                                                                                                                                                                                                                                                                                                                                                                                                                                                                                                                                                                                                                                                                                                                                                                                                                                                                                                                                                                                                                                                                                                                                                                                                                                                                                                                                                                                                                                                                                                                                 |                   |
| <b>First Author:</b>                                 | Zhangjun Fei                                                                                                                                                                                                                                                                                                                                                                                                                                                                                                                                                                                                                                                                                                                                                                                                                                                                                                                                                                                                                                                                                                                                                                                                                                                                                                                                                                                                                                                                                                                                                                                                                                                                                                                                                                                                    |                   |
| <b>First Author Secondary Information:</b>           |                                                                                                                                                                                                                                                                                                                                                                                                                                                                                                                                                                                                                                                                                                                                                                                                                                                                                                                                                                                                                                                                                                                                                                                                                                                                                                                                                                                                                                                                                                                                                                                                                                                                                                                                                                                                                 |                   |
| <b>Order of Authors:</b>                             | Zhangjun Fei                                                                                                                                                                                                                                                                                                                                                                                                                                                                                                                                                                                                                                                                                                                                                                                                                                                                                                                                                                                                                                                                                                                                                                                                                                                                                                                                                                                                                                                                                                                                                                                                                                                                                                                                                                                                    |                   |
|                                                      | Wei Tang                                                                                                                                                                                                                                                                                                                                                                                                                                                                                                                                                                                                                                                                                                                                                                                                                                                                                                                                                                                                                                                                                                                                                                                                                                                                                                                                                                                                                                                                                                                                                                                                                                                                                                                                                                                                        |                   |
|                                                      | Xuepeng Sun                                                                                                                                                                                                                                                                                                                                                                                                                                                                                                                                                                                                                                                                                                                                                                                                                                                                                                                                                                                                                                                                                                                                                                                                                                                                                                                                                                                                                                                                                                                                                                                                                                                                                                                                                                                                     |                   |
|                                                      | Junyang Yue                                                                                                                                                                                                                                                                                                                                                                                                                                                                                                                                                                                                                                                                                                                                                                                                                                                                                                                                                                                                                                                                                                                                                                                                                                                                                                                                                                                                                                                                                                                                                                                                                                                                                                                                                                                                     |                   |
|                                                      | Xiaofeng Tang                                                                                                                                                                                                                                                                                                                                                                                                                                                                                                                                                                                                                                                                                                                                                                                                                                                                                                                                                                                                                                                                                                                                                                                                                                                                                                                                                                                                                                                                                                                                                                                                                                                                                                                                                                                                   |                   |
|                                                      | Chen Jiao                                                                                                                                                                                                                                                                                                                                                                                                                                                                                                                                                                                                                                                                                                                                                                                                                                                                                                                                                                                                                                                                                                                                                                                                                                                                                                                                                                                                                                                                                                                                                                                                                                                                                                                                                                                                       |                   |
|                                                      | Ying Yang                                                                                                                                                                                                                                                                                                                                                                                                                                                                                                                                                                                                                                                                                                                                                                                                                                                                                                                                                                                                                                                                                                                                                                                                                                                                                                                                                                                                                                                                                                                                                                                                                                                                                                                                                                                                       |                   |

|                                                                                                                                                                                                                                                                                                                                                                                                                                                                                                                                     |                  |
|-------------------------------------------------------------------------------------------------------------------------------------------------------------------------------------------------------------------------------------------------------------------------------------------------------------------------------------------------------------------------------------------------------------------------------------------------------------------------------------------------------------------------------------|------------------|
|                                                                                                                                                                                                                                                                                                                                                                                                                                                                                                                                     | Xiangli Niu      |
|                                                                                                                                                                                                                                                                                                                                                                                                                                                                                                                                     | Min Miao         |
|                                                                                                                                                                                                                                                                                                                                                                                                                                                                                                                                     | Danfeng Zhang    |
|                                                                                                                                                                                                                                                                                                                                                                                                                                                                                                                                     | Shengxiong Huang |
|                                                                                                                                                                                                                                                                                                                                                                                                                                                                                                                                     | Wei Shi          |
|                                                                                                                                                                                                                                                                                                                                                                                                                                                                                                                                     | Mingzhang Li     |
|                                                                                                                                                                                                                                                                                                                                                                                                                                                                                                                                     | Congbing Fang    |
|                                                                                                                                                                                                                                                                                                                                                                                                                                                                                                                                     | Yongsheng Liu    |
| <b>Order of Authors Secondary Information:</b>                                                                                                                                                                                                                                                                                                                                                                                                                                                                                      |                  |
| <b>Response to Reviewers:</b>                                                                                                                                                                                                                                                                                                                                                                                                                                                                                                       | NA               |
| <b>Additional Information:</b>                                                                                                                                                                                                                                                                                                                                                                                                                                                                                                      |                  |
| <b>Question</b>                                                                                                                                                                                                                                                                                                                                                                                                                                                                                                                     | <b>Response</b>  |
| Are you submitting this manuscript to a special series or article collection?                                                                                                                                                                                                                                                                                                                                                                                                                                                       | No               |
| <p><b>Experimental design and statistics</b></p> <p>Full details of the experimental design and statistical methods used should be given in the Methods section, as detailed in our <a href="#">Minimum Standards Reporting Checklist</a>. Information essential to interpreting the data presented should be made available in the figure legends.</p> <p>Have you included all the information requested in your manuscript?</p>                                                                                                  | Yes              |
| <p><b>Resources</b></p> <p>A description of all resources used, including antibodies, cell lines, animals and software tools, with enough information to allow them to be uniquely identified, should be included in the Methods section. Authors are strongly encouraged to cite <a href="#">Research Resource Identifiers</a> (RRIDs) for antibodies, model organisms and tools, where possible.</p> <p>Have you included the information requested as detailed in our <a href="#">Minimum Standards Reporting Checklist</a>?</p> | Yes              |

|                                                                                                                                                                                                                                                                                                                                                                                                                                                                                                                                                         |            |
|---------------------------------------------------------------------------------------------------------------------------------------------------------------------------------------------------------------------------------------------------------------------------------------------------------------------------------------------------------------------------------------------------------------------------------------------------------------------------------------------------------------------------------------------------------|------------|
| <p><b>Availability of data and materials</b></p> <p>All datasets and code on which the conclusions of the paper rely must be either included in your submission or deposited in <a href="#">publicly available repositories</a> (where available and ethically appropriate), referencing such data using a unique identifier in the references and in the “Availability of Data and Materials” section of your manuscript.</p> <p>Have you have met the above requirement as detailed in our <a href="#">Minimum Standards Reporting Checklist</a>?</p> | <p>Yes</p> |
|---------------------------------------------------------------------------------------------------------------------------------------------------------------------------------------------------------------------------------------------------------------------------------------------------------------------------------------------------------------------------------------------------------------------------------------------------------------------------------------------------------------------------------------------------------|------------|

[Click here to view linked References](#)

1  
2  
3  
4  
5  
6  
7  
8  
9  
10  
11  
12  
13  
14  
15  
16  
17  
18  
19  
20  
21  
22  
23  
24  
25  
26  
27  
28  
29  
30  
31  
32  
33  
34  
35  
36  
37  
38  
39  
40  
41  
42  
43  
44  
45  
46  
47  
48  
49  
50  
51  
52  
53  
54  
55  
56  
57  
58  
59  
60  
61  
62  
63  
64  
65

1 **Chromosome-scale genome assembly of kiwifruit *Actinidia eriantha* with single-molecule**  
2 **sequencing and chromatin interaction mapping**

3  
4 Wei Tang<sup>1,2,3,†</sup>, Xuepeng Sun<sup>4,†</sup>, Junyang Yue<sup>1,3,†</sup>, Xiaofeng Tang<sup>1,3</sup>, Chen Jiao<sup>4</sup>, Ying Yang<sup>1</sup>,  
5 Xiangli Niu<sup>1,3</sup>, Min Miao<sup>1,3</sup>, Danfeng Zhang<sup>3</sup>, Shengxiong Huang<sup>3</sup>, Wei Shi<sup>3</sup>, Mingzhang Li<sup>5</sup>,  
6 Congbing Fang<sup>1</sup>, Zhangjun Fei<sup>4,6\*</sup>, Yongsheng Liu<sup>1,2,3\*</sup>

7  
8 <sup>1</sup>School of Horticulture, Anhui Agricultural University, Hefei 230036, China

9 <sup>2</sup>Ministry of Education Key Laboratory for Bio-resource and Eco-environment, College of Life  
10 Science, State Key Laboratory of Hydraulics and Mountain River Engineering, Sichuan  
11 University, Chengdu 610064, China

12 <sup>3</sup>School of Food Science and Engineering, Hefei University of Technology, Hefei 230009, China

13 <sup>4</sup>Boyce Thompson Institute, Cornell University, Ithaca NY 14853, USA

14 <sup>5</sup>Sichuan Academy of Natural Resource Sciences, Chengdu 610015, China

15 <sup>6</sup>U.S. Department of Agriculture-Agricultural Research Service, Robert W. Holley Center for  
16 Agriculture and Health, Ithaca, NY 14853, USA

17 Chen Jiao, ORCID: 0000-0002-3327-0547

18 Zhangjun Fei, ORCID: 0000-0001-9684-1450

19 <sup>†</sup>These authors contributed equally to this work

20 \*Correspondence: Dr. Zhangjun Fei, email: [zf25@cornell.edu](mailto:zf25@cornell.edu) or Dr. Yongsheng Liu, email:

21 [liuyongsheng1122@hfut.edu.cn](mailto:liuyongsheng1122@hfut.edu.cn)

1  
2  
3  
4  
5  
6  
7  
8  
9  
10  
11  
12  
13  
14  
15  
16  
17  
18  
19  
20  
21  
22  
23  
24  
25  
26  
27  
28  
29  
30  
31  
32  
33  
34  
35  
36  
37  
38  
39  
40  
41  
42  
43  
44  
45  
46  
47  
48  
49  
50  
51  
52  
53  
54  
55  
56  
57  
58  
59  
60  
61  
62  
63  
64  
65

23 **Abstract**

24 **Background:** Kiwifruit (*Actinidia* spp.) is a dioecious plant with fruits containing abundant  
25 vitamin C and minerals. A handful of kiwifruit species have been domesticated, among which  
26 the *A. eriantha* is increasingly favored in breeding due to its superior commercial traits. Recently,  
27 elite cultivars from *A. eriantha* have been successfully selected and further studies on their  
28 biology and breeding potential require genomic information which is currently unavailable.

29 **Findings:** Here, we assembled a chromosome-scale genome sequence of *A. eriantha* cv. White  
30 using single-molecular sequencing and chromatin interaction map-based scaffolding. The  
31 assembly has a total size of 690.6 Mb and an N50 of 21.7 Mb. Approximately 99% of the  
32 assembly were in 29 pseudomolecules corresponding to the 29 kiwifruit chromosomes. Forty-  
33 three percent of the *A. eriantha* genome are repetitive sequences, and the non-repetitive part  
34 encodes 42,988 protein-coding genes, of which 39,075 have homologues from other plant  
35 species or protein domains. The divergence time between *A. eriantha* and its close relative *A.*  
36 *chinensis* is estimated to be 3.3 million years, and after diversification, 1,727 and 1,506 gene  
37 families are expanded and contracted in *A. eriantha*, respectively.

38 **Conclusions:** We provide a high-quality reference genome for kiwifruit *A. eriantha*. This  
39 chromosome-scale genome assembly is substantially better than two published kiwifruit  
40 assemblies from *A. chinensis* in terms of genome contiguity and completeness. The availability  
41 of *A. eriantha* genome provides a valuable resource for facilitating kiwifruit breeding and studies  
42 of kiwifruit biology.

43

44 **Key words:** Kiwifruit; *Actinidia eriantha*; Genome assembly; single molecular sequencing; Hi-C

45

1  
2  
3  
4 46 **Data description**

5  
6  
7 47 ***Introduction***

8  
9 48 Kiwifruit is well known as the king of fruits due to its remarkably high vitamin C content and  
10  
11 49 abundant minerals [1, 2]. Native to China, kiwifruit belongs to the genus *Actinidia* which  
12  
13  
14 50 contains 54 species and 75 taxa [3]. All species in this genus are perennial, deciduous and  
15  
16 51 dioecious plants with a climbing or scrambling growth habit, and they also have many common  
17  
18  
19 52 morphological features including the characteristic radiating arrangement of styles of female  
20  
21 53 flower and the structure of the fruit [4]. Despite rich germplasm resources in kiwifruit, only a  
22  
23  
24 54 few *Actinidia* species have been domesticated, such as *A. chinensis* var. *chinensis*, *A. chinensis*  
25  
26 55 var. *deliciosa* and *A. eriantha*, whose fruit size are close to commercial standard [5-7].

27  
28  
29 56 Owing to its strong resistance to *Pseudomonas syringae* pv. *Actinidiae*, long shelf-life,  
30  
31 57 enriched ascorbic acid and peelable skin [7-11], *A. eriantha* (2n=58) has been favored in  
32  
33  
34 58 kiwifruit breeding. Recently, new cultivars have been selected either from the wild germplasm of  
35  
36 59 *A. eriantha* such as ‘White’ (Fig. 1) or from the interspecific hybridization between *A. eriantha*  
37  
38 60 (♂) and *A. chinensis* (♀) such as ‘Jinyan’ [7, 12]. ‘White’ has particularly large fruits (96 g on  
39  
40  
41 61 average) with green flesh and favorable flavor and has been widely cultivated in China [7].

42  
43 62 *Actinidia eriantha* (*Actinidia eriantha*, NCBI:txid165200) has also been used for genetic  
44  
45  
46 63 and genomic studies thanks to its high efficiency in genetic transformation and relatively short  
47  
48 64 phase of juvenility [13]. The flowering and fruiting of *A. eriantha* can be accomplished within  
49  
50  
51 65 two years in green house conditions with a low requirement for winter chilling [13]. In addition,  
52  
53 66 roots of *A. eriantha* which contain many bioactive compounds such as triterpenes and  
54  
55  
56 67 polysaccharides are employed as a traditional Chinese medicine for the treatment of gastric  
57  
58 68 carcinoma, nasopharyngeal carcinoma, breast carcinoma, and hepatitis [12, 14].

1  
2  
3  
4 69 Previously, two kiwifruit genomes were published and both were varieties of *A. chinensis*  
5  
6 70 ('Hongyang' and 'Red5') [15, 16]. These short-read based assemblies are very fragmented,  
7  
8  
9 71 possibly due to the high complexity and heterozygosity of the kiwifruit genomes as well as  
10  
11 72 technical limitations. Here, we used single-molecular sequencing combined with high-  
12  
13  
14 73 throughput chromosome conformation capture (Hi-C) technology to assemble the genome of the  
15  
16 74 elite kiwifruit cultivar 'White' of *A. eriantha*. The availability of this high-quality chromosome-  
17  
18  
19 75 scale genome sequence not only provides fundamental knowledge regarding kiwifruit biology  
20  
21 76 but also presents a valuable resource for kiwifruit breeding programs.  
22  
23

24 77  
25  
26 78 ***Sample collection and genome sequencing***  
27  
28 79 Fresh young leaves were collected from a female individual of *A. eriantha* cv. White. High  
29  
30  
31 80 molecular weight (HMW) genomic DNA was extracted using the CTAB method as described in  
32  
33 81 the protocol ([https://www.pacb.com/wp-content/uploads/2015/09/Shared-Protocol-Preparing-](https://www.pacb.com/wp-content/uploads/2015/09/Shared-Protocol-Preparing-Arabidopsis-DNA-for-20-kb-SMRTbell-Libraries.pdf)  
34  
35  
36 82 *Arabidopsis-DNA-for-20-kb-SMRTbell-Libraries.pdf*). To construct genomic libraries  
37  
38 83 (SMRTbell libraries) for PacBio long-read sequencing, HMW genomic DNA was sheared into  
39  
40  
41 84 fragments of approximately 20 kb using a Covaris g-Tube (KBiosciences p/n520079),  
42  
43 85 enzymatically repaired and converted to SMRTbell template following the Manufacturer's  
44  
45  
46 86 instruction (DNA Template Prep Kit 1.0, PacBio p/n 100-259-100). The templates were size-  
47  
48 87 selected using a BluePippin (SageScience, Inc.) to enrich large DNA fragments (> 10 kb) and  
49  
50  
51 88 then sequenced on a PacBio Sequel system. A total of 9 SMRT cells were sequenced, yielding  
52  
53 89 3,889,480 million reads with a mean and median length of 10,065 and 15,661 bp, respectively,  
54  
55  
56 90 and a total of 39.1 Gb sequences, about 52.5× coverage of the kiwifruit genome with an  
57  
58 91 estimated size of 745.3 Mb based on the flow cytometry analysis (Fig. S1; Table S1).  
59  
60  
61  
62  
63  
64  
65

1  
2  
3  
4 92 Three paired-end Illumina libraries with insert sizes of 180, 220 and 500 bp, and seven  
5  
6 93 mate-pair libraries with insert sizes of 3, 4, 5, 8, 10, 15, 17 kb, were prepared using Illumina's  
7  
8  
9 94 Genomic DNA Sample Preparation kit and the Nextera Mate Pair Sample Preparation kit  
10  
11 95 (Illumina, San Diego, CA), respectively. All libraries were sequenced on an Illumina HiSeq 2500  
12  
13  
14 96 system, which yielded about 80.1 and 97.3 Gb of raw sequence data for paired-end and mate-pair  
15  
16 97 libraries, respectively (Table S1). The raw Illumina paired-end reads were processed to remove  
17  
18  
19 98 duplications, adaptors and low-quality bases using Super-Deduper [17] and Trimmomatic  
20  
21 99 (Trimmomatic, RRID:SCR\_011848) [18] (v0.35), and the mate-pair reads were cleaned using  
22  
23  
24 100 NextClip (NextClip, RRID:SCR\_005465) [19] (v1.3.1) with default parameters. Finally, we  
25  
26 101 obtained 76.6 and 46.2 Gb high-quality cleaned sequences for paired-end and mate-pair libraries,  
27  
28  
29 102 respectively (Table S1).

30  
31 103 To construct the Hi-C library, 'White' plants were grown in a greenhouse, and  
32  
33 104 approximately 4~6 grams young leaves were then harvested and subsequently fixed in the  
34  
35  
36 105 formaldehyde (1% v/v) for 10 min at room temperature. The fixation was terminated by adding  
37  
38 106 glycine to a final concentration of 0.125M. The fixed samples were ground into powder in liquid  
39  
40  
41 107 nitrogen and then lysed with the addition of Triton X-100 to a concentration of 1% (v/v). The  
42  
43 108 nuclei were isolated and prepared for Hi-C library construction according to a previously  
44  
45  
46 109 published protocol [20].

### 47 48 110 49 50 111 ***Transcriptome sequencing***

51  
52  
53 112 To improve gene prediction, we generated transcriptome sequences from a pool of mixed tissues  
54  
55 113 of 'White' including root, stem, leaf, flower, and fruits at 7, 30, 60, 90 and 120 days after  
56  
57  
58 114 anthesis. Total RNA was extracted from these tissues using an RNA extraction kit (BIOFIT,



1  
2  
3  
4  
5  
6  
7  
8  
9  
10  
11  
12  
13  
14  
15  
16  
17  
18  
19  
20  
21  
22  
23  
24  
25  
26  
27  
28  
29  
30  
31  
32  
33  
34  
35  
36  
37  
38  
39  
40  
41  
42  
43  
44  
45  
46  
47  
48  
49  
50  
51  
52  
53  
54  
55  
56  
57  
58  
59  
60  
61  
62  
63  
64  
65

China), treated with DNase I and further purified with RNA clean kit (Promega, USA). RNA-Seq libraries were constructed with the NEBNext® Ultra™ RNA Library Prep Kit (Illumina, USA), and sequenced on an Illumina HiSeq 2500 system using paired-end mode. A total of ~19.5 million raw read pairs were obtained, which were processed with Trimmomatic to remove adaptors. The cleaned reads were assembled *de novo* with Trinity (Trinity, RRID:SCR\_013048) [21] (version 2.4.0). Additionally, we also generated genome-guided assemblies with both Trinity and StringTie (StringTie, RRID:SCR\_016323) [22]. Different transcriptome assemblies were eventually integrated by PASA (PASA, RRID:SCR\_014656) [23] (version 2.3.3) and used as transcript evidence during gene prediction process. Mapping of RNA-Seq reads to the genome assembly was performed with STAR ((STAR, RRID:SCR\_015899)) [24] (version 020201), and read counting on the coding regions was performed with HTSeq (HTSeq, RRID:SCR\_005514) [25] (version 0.6.0.).

***Chromosome-scale assembly of the A. eriantha genome***

*Actinidia eriantha* is a dioecious plant with a heterozygous diploid genome. We estimated the heterozygosity level through the k-mer spectrum analysis with GenomeScope [26] using sequences from the paired-end library with the insert size of 180 bp. The depth distribution of the derived 17-mers clearly showed two separate peaks, based on which we estimated the heterozygosity level of the *A. eriantha* cv. White genome to be 1.21% (Fig. S1).

We then estimated the genome size of *A. eriantha* cv. White using the flow cytometry analysis, with tomato (*Solanum lycopersicum* cv. Ailsa Craig) used as the reference. We also performed flow cytometry analysis on *A. chinensis* cv. Hongyang. Approximately 1 g of young leaves were washed twice in distilled water and then chopped in ice-cold lysis buffer A (10

1  
2  
3  
4 138 mmol/L MgSO<sub>4</sub>, 50 mmol/L KCl, 3.5 mmol/L HEPES pH 7.5, 0.3% (v/v) Triton x-100, 2%  
5  
6  
7 139 PVP 30 (W/V)). After 5 minutes, the crude lysate was passed through a 75- $\mu$ m pore size nylon  
8  
9 140 mesh to remove large cellular debris. The filtrate (1 ml) was transferred to a 1.5 ml plastic tube  
10  
11  
12 141 and centrifuged at 1000 rpm for 5 minutes. The supernatant was discard, and the nuclei were  
13  
14 142 then resuspended with lysis buffer B (10 mmol/L MgSO<sub>4</sub>, 50 mmol/L KCl, 3.5 mmol/L HEPES  
15  
16 143 pH 7.5, 0.3% (v/v) Triton x-100, 0.4 mg/ml Propidium Iodide, 0.04 mg/ml RNase). After 15  
17  
18  
19 144 minutes, samples were analyzed using a FACS Vantage SE flow cytometer (Becton-Dickinson,  
20  
21 145 San José, USA). Four biological replicates were performed. Based on the 950-Mb genome of  
22  
23  
24 146 tomato, the genome size of ‘White’ was estimated to be 745.3 $\pm$ 7.9 Mb, similar to the genome  
25  
26 147 size of *A. chinensis* (Fig. S1) and consistent with that in a previous report (758 Mb; [27]).  
27

28  
29 148 We employed a strategy which took into account the unique advantage of different  
30  
31 149 assemblers to construct the ‘White’ genome using PacBio long reads. First, PacBio long reads  
32  
33 150 were corrected and assembled using the Canu program (Canu, RRID:SCR\_015880) [28] (v1.7),  
34  
35  
36 151 which is a modularized pipeline consisting of three primary stages - read correction, trimming  
37  
38 152 and assembly. The Canu-corrected reads were also assembled independently with the wtdbg  
39  
40  
41 153 program (<https://github.com/ruanjue/wtdbg>), a fast assembler for long noisy reads. Subsequently,  
42  
43 154 the two independent assemblies (one with Canu and another with wtdbg) were merged by  
44  
45 155 Quickmerge [29] (v0.2) to improve the contiguity. The merged assembly was further processed  
46  
47  
48 156 to correct errors using Pilon (Pilon, RRID:SCR\_014731) [30] (version 1.22) with high-quality  
49  
50  
51 157 cleaned Illumina reads from all paired-end and mate-pair libraries representing a total genome  
52  
53 158 coverage of 171 $\times$  (Table S1). This yielded 2,818,370 nucleotides, 2,495,388 insertions and  
54  
55 159 1,691,495 deletions being corrected. The resulting final assembled *A. eriantha* cv. White genome  
56  
57  
58 160 contained 4,076 contigs with a N50 length of 539,246 bp and a cumulative size of 690,376,929  
59  
60  
61  
62  
63  
64  
65

1  
2  
3  
4 161 bp (Table 1). The contiguity and completeness of this assembly far exceeds that of two published  
5  
6  
7 162 kiwifruit *A. chinensis* genomes (Table 1).  
8

9 163

10  
11 164

12  
13  
14 165 Table 1 Assembly statistics

|                                            | <i>A. eriantha</i> |              | <i>A. chinensis</i> |  |
|--------------------------------------------|--------------------|--------------|---------------------|--|
|                                            | White              | Hongyang     | Red5                |  |
| <b>Contigs</b>                             |                    |              |                     |  |
| Total contig number (#)                    | 4,076              | 26,721       | 39,868              |  |
| Total contig length (Mb)                   | 690.4              | 604.2        |                     |  |
| Contig N50 (kb)                            | 539.2              | 58.9         |                     |  |
| Contig N90 (kb)                            | 50.7               | 11.6         |                     |  |
| Longest contig length (kb)                 | 3,260.20           | 423.5        |                     |  |
| <b>Scaffolds</b>                           |                    |              |                     |  |
| Total scaffold number (#)                  | 1,735              | 7,698        | 3,887               |  |
| Total scaffold length (Mb)                 | 690.6              | 616.1        | 550.5               |  |
| Scaffold N50 (kb)                          | 23,583.9           | 646.8        | 623.8               |  |
| Scaffold N90 (kb)                          | 20,112.1           | 122.7        | 140.7               |  |
| Longest scaffold length (Mb)               | 28.6               | 3.4          | 4.43                |  |
| Anchored to chromosome (Mb/%)              | 682.4 / 98.84      | 452.4 / 73.4 | 547.9 / 98.9        |  |
| Anchored with order and orientation (Mb/%) | 634.4 / 91.90      | 333.6 / 54.1 |                     |  |

15  
16  
17  
18  
19  
20  
21  
22  
23  
24  
25  
26  
27  
28  
29  
30  
31  
32  
33  
34  
35 166

36  
37 167 To scaffold the contigs based on chromatin interaction maps inferred from the Hi-C data,  
38  
39  
40 168 we first used HiC-Pro [31] to evaluate and filter the cleaned Hi-C reads. The Hi-C data usually  
41  
42 169 contains a considerable part of invalid interaction read pairs which are non-informative and need  
43  
44  
45 170 to be filtered out beforehand. Among the 51 million read pairs that were uniquely aligned to the  
46  
47 171 *A. eriantha* assembly, 33 million (64.1%) were valid interaction pairs and their insertion size  
48  
49  
50 172 spanned predominantly from dozens to hundreds of kilobases, therefore providing efficient  
51  
52 173 information for scaffolding. As a part of error correction of the assembly, we used valid Hi-C  
53  
54 174 reads to identify misassembled contigs. In principle, a genuine contig should display a  
55  
56  
57 175 continuous Hi-C interaction map whereas the discrete distribution of an interaction map likely  
58  
59 176 indicates a misassembly. We examined the interaction map for each contig and broke 51 that  
60  
61  
62  
63  
64  
65

1  
2  
3  
4 177 were possibly misassembled. Subsequently, the corrected PacBio assembly was used for  
5  
6 178 scaffolding with the LACHESIS program [32] and parameters  
7  
8  
9 179 “CLUSTER\_MIN\_RE\_SITES=48, CLUSTER\_MAX\_LINK\_DENSITY=2,  
10  
11 180 CLUSTER\_NONINFORMATIVE\_RATIO=2, ORDER\_MIN\_N\_RES\_IN\_TRUN=14,  
12  
13  
14 181 ORDER\_MIN\_N\_RES\_IN\_SHREDS=15”. LACHESIS assigned 3,666 contigs with a total size  
15  
16 182 of 682,355,494 bp (98.84% of the assembly) into 29 groups corresponding to the 29 kiwifruit  
17  
18 183 chromosomes (Fig. 2 and 3a), among which 634,430,648 bp (91.90%) had defined order and  
19  
20  
21 184 orientation (Table 1 and S2). The final chromosome-scale assembly had a total length of  
22  
23  
24 185 690,781,529 bp and an N50 of 23,583,865 bp.  
25  
26 186

### 27 28 29 187 *Evaluation of the genome assembly*

30  
31 188 We first evaluated the quality of the assembled *A. eriantha* cv. White genome by mapping  
32  
33 189 Illumina genomic and RNA-Seq reads to the assembly. Reads from the paired-end genomic  
34  
35  
36 190 library (with insert size of 180 bp) had very high mapping rate (98.7%), and the properly paired  
37  
38 191 read mapping rate was 92.0%. For the RNA-Seq reads, 91.7% could be mapped to the genome  
39  
40  
41 192 and 87.1% were uniquely mapped. The high mapping ratio of both genomic and RNA-Seq reads  
42  
43 193 suggest a high quality of the *A. eriantha* cv. White assembly.  
44

45  
46 194 We then identified synteny between the *A. eriantha* cv. White assembly and the assembly  
47  
48 195 of *A. chinensis* cv. Red5 using MUMMER [33] (version 4.0.0beta2). In general, the two  
49  
50 196 assemblies showed a high macro-collinearity, with only a few inconsistencies (Fig. 3b). Detailed  
51  
52  
53 197 check of the major inconsistent regions using genetic maps [34] and mate-pair read alignments  
54  
55 198 confirmed the high quality of the *A. eriantha* cv. White genome assembly, and particularly  
56  
57  
58  
59  
60  
61  
62  
63  
64  
65

1  
2  
3  
4  
5  
6  
7  
8  
9  
10  
11  
12  
13  
14  
15  
16  
17  
18  
19  
20  
21  
22  
23  
24  
25  
26  
27  
28  
29  
30  
31  
32  
33  
34  
35  
36  
37  
38  
39  
40  
41  
42  
43  
44  
45  
46  
47  
48  
49  
50  
51  
52  
53  
54  
55  
56  
57  
58  
59  
60  
61  
62  
63  
64  
65

199 enabled us to discover that in the ‘Red5’ genome a ~8-Mb region was possibly misassembled  
200 into chromosome 23 (Fig. S2).

201  
202 ***Repeat annotation***

203 Repeats were annotated following a protocol described in Campbell et al [35]. The customized  
204 repeat library was built to include both known and novel repeat families. We first searched the  
205 assembly for miniature inverted transposable elements (MITEs) using MITE-Hunter [36] with  
206 default parameters. The long terminal repeat (LTR) retrotransposons were then identified from  
207 the *A. eriantha* cv. White genome using LTRharvest and LTRdigest wrapped in the  
208 GenomeTools package [37]. The LTR identification pipeline was run iteratively to collect both  
209 recent (sequence similarity  $\geq 99\%$ ) and old (sequence similarity  $\geq 85\%$ ) LTR retrotransposons.  
210 Candidates from each run were filtered based on the elements typically encoded by LTR  
211 retrotransposons. The default parameters (-minlenltr 100 -maxlenltr 6000 -mindistltr 1500 -  
212 maxdistltr 25000 -mintsd 5 -maxtsd 5 -motif tgca) were used in LTR calling according to  
213 Campbell *et al.* [35]. An initial repeat masking of *A. eriantha* cv. White genome was performed  
214 with the repeat library derived by combining the identified MITEs and LTR transposons. The  
215 repeat masked genome was fed to RepeatModeler (RepeatModeler, RRID:SCR\_015027)  
216 (<http://www.repeatmasker.org/RepeatModeler/>) to identify novel repeat families. Finally, all  
217 identified repeat sequences were combined and searched against a plant protein database where  
218 transposon encoding proteins were excluded. Elements with significant similarity to plant genes  
219 were removed. The final repeat library contained 1,670 families, and 526 of them were  
220 potentially novel repeat families. We used this species-specific repeat library to mask the *A.*  
221 *eriantha* cv. White genome. Approximately 43.3% of the *A. eriantha* cv. White genome was

1  
2  
3  
4  
5  
6  
7  
8  
9  
10  
11  
12  
13  
14  
15  
16  
17  
18  
19  
20  
21  
22  
23  
24  
25  
26  
27  
28  
29  
30  
31  
32  
33  
34  
35  
36  
37  
38  
39  
40  
41  
42  
43  
44  
45  
46  
47  
48  
49  
50  
51  
52  
53  
54  
55  
56  
57  
58  
59  
60  
61  
62  
63  
64  
65

222 masked, and the largest family of repeats was LTR transposons (Table S3). Repeat content  
223 identified in *A. eriantha* cv. White was much higher than that in *A. chinensis* (e.g. 36% in  
224 Hongyang [15]), and this difference may be largely due to the improvement of the repeat region  
225 assembly with PacBio long reads. In addition, divergence between the two kiwifruit species  
226 could also contribute to this difference.

227

***Prediction and functional annotation of protein-coding genes***

229 Protein-coding genes were predicted from the repeat-masked *A. eriantha* cv. White genome with  
230 the MAKER-P program [35] (version 2.31.10), which integrates evidence from protein  
231 homology, transcripts and *ab initio* predictions. The homology-based evidence was derived by  
232 aligning proteomes from 20 plant species to the ‘White’ genome assembly with exonerate  
233 (Exonerate, RRID:SCR\_016088) (v2.26.1; [https://www.ebi.ac.uk/about/vertebrate-](https://www.ebi.ac.uk/about/vertebrate-genomics/software/exonerate)  
234 [genomics/software/exonerate](https://www.ebi.ac.uk/about/vertebrate-genomics/software/exonerate)). SNAP [38], AUGUSTUS (Augustus, RRID:SCR\_008417) [39]  
235 (version 3.3), and GeneMark-ES (GeneMark, RRID:SCR\_011930) [40] (version 4.35) were used  
236 for *ab initio* gene predictions. RNA-Seq data generated in this study were assembled and the  
237 assembled contigs were aligned to the ‘White’ genome assembly to provide transcript evidence.  
238 Predictions supported by the three different sources of evidence were finally integrated by  
239 MAKER-P (MAKER, RRID:SCR\_005309), which resulted in a total of 52,514 primitive gene  
240 models. We then filtered and polished these gene models by two steps. First, we combined our  
241 RNA-Seq data with others collected from a previous study [41], and mapped the reads to the  
242 ‘White’ genome using the STAR program [24], and a total of 266 million read pairs were  
243 mapped. Based on the mapping, raw count for each predicted gene model was derived and then  
244 normalized to CPM (counts per million mapped read pairs). Gene models with ultra-low

1  
2  
3  
4  
5  
6  
7  
8  
9  
10  
11  
12  
13  
14  
15  
16  
17  
18  
19  
20  
21  
22  
23  
24  
25  
26  
27  
28  
29  
30  
31  
32  
33  
34  
35  
36  
37  
38  
39  
40  
41  
42  
43  
44  
45  
46  
47  
48  
49  
50  
51  
52  
53  
54  
55  
56  
57  
58  
59  
60  
61  
62  
63  
64  
65

245 expression (CPM < 0.1) were less likely to be real genes. Furthermore, we found that these lowly  
246 expressed genes had relatively high annotation edit distance (AED) score, an indication of low-  
247 confidence as defined by MAKER-P program. Therefore, for gene models with CPM < 0.1, we  
248 only kept those containing both pfam domains and homologous sequences in the NCBI nr  
249 protein database. After this filtering process 42,751 gene models were kept. Second, the  
250 predicted protein-coding genes of kiwifruit *A. chinensis* cv. Red5 have been manually curated  
251 [16], and therefore these gene models should have relatively higher accuracy and could be used  
252 to modify *A. eriantha* cv. White gene models whose predictions were not consistently supported  
253 by the different types of evidence. To this end, we performed another two *ab initio* predictions  
254 using BRAKER [42] and GeMoMa [43] (version 1.5.2) with ‘Red5’ proteome as the sole  
255 evidence. These two predictions were compared with the gene models predicted by MAKER-P.  
256 Consequently, a total of 237 gene models not predicted by MAKER-P were added and another  
257 415 gene models which had better predictions by BRAKER2 or GeMoMa were used to replace  
258 the corresponding gene models predicted by MAKER-P. Finally, we obtained a total of 42,988  
259 protein-coding genes in the *A. eriantha* cv. White genome, with a mean coding sequence (CDS)  
260 size of 1,004 bp and containing an average of five exons.

261         The predicted genes were functionally annotated by blasting their protein sequences  
262 against TAIR (TAIR, RRID:SCR\_004618) [44], Swiss-Prot [45] and TrEMBL [46] databases  
263 with an E-value cutoff of 1e-5. Functional descriptions of the protein hits were assembled with  
264 the AHRD program (<https://github.com/groupschoof/AHRD>) and transferred to *A. eriantha*  
265 genes. Protein domains were identified using InterProScan (InterProScan, RRID:SCR\_005829)  
266 [47] (version 5.29-68.0) by searching the protein sequences against domain databases including  
267 PANTHER (PANTHER, RRID:SCR\_004869) [48], Pfam (Pfam, RRID:SCR\_004726) [49],

1  
2  
3  
4 268 SMART (SMART, RRID:SCR\_005026) [50], and PROSITE (PROSITE, RRID:SCR\_003457)  
5  
6  
7 269 [51]. The gene ontology (GO) terms were assigned to the *A. eriantha* cv. White predicted genes  
8  
9 270 using the Blast2GO program (Blast2GO, RRID:SCR\_005828) [52] with entries from NCBI  
10  
11 271 protein database and InterProScan. Collectively, 90.9% (N=39,075) of the predicted genes  
12  
13  
14 272 contain at least one annotation from the above databases (Table S4).

15  
16 273

### 19 274 ***Evolutionary and comparative genomic analysis***

21 275 To infer the divergence time between *A. eriantha* and *A. chinensis*, we identified gene orthology  
22  
23 276 between the two species using MCScanX [53] and calculated synonymous substitution rate (Ks)  
24  
25  
26 277 between each orthologous pair. Three additional species, cultivated tomato (*Solanum*  
27  
28 278 *lycopersicum*), wild tomato (*S. pennellii*) and potato (*S. tuberosum*), were also included in the  
29  
30  
31 279 analysis. The Ks distribution (Fig. 4a) suggested that the divergence between the two kiwifruit  
32  
33 280 species was earlier than that between the two tomato species. We dated the divergence by  
34  
35  
36 281 assuming a strict molecular clock [54], and the time when *A. eriantha* and *A. chinensis* separated  
37  
38 282 was estimated to be ~3.3 million years ago (Mya), compared to ~1.9 Mya between *S.*  
39  
40  
41 283 *lycopersicum* and *S. pennellii* and ~6.0 Mya between *S. lycopersicum* and *S. tuberosum*. Gene  
42  
43 284 family evolution was analyzed by comparing genomes of *A. eriantha*, *A. chinensis*, *S.*  
44  
45 285 *lycopersicum*, *S. tuberosum*, *Vitis vinifera*, *Arabidopsis thaliana* and *Oryza sativa*. A total of  
46  
47  
48 286 17,593 orthogroups were defined by OrthoFinder [55] (version 2.2.6) and among which 1,246  
49  
50  
51 287 were single-copy gene families (Fig. 4b). The single-copy family genes were aligned and  
52  
53 288 concatenated to build a species phylogenetic tree using IQ-TREE [56] (version 1.5.5) with a  
54  
55 289 best-fitting model (Fig. 4c). Gene family expansion/contraction along the branches of the  
56  
57  
58 290 phylogenetic tree was analyzed by CAFÉ [57] (version 4.1). Finally, a total of 1,727 and 1,506  
59  
60  
61  
62  
63  
64  
65



1  
2  
3  
4  
5  
6  
7  
8  
9  
10  
11  
12  
13  
14  
15  
16  
17  
18  
19  
20  
21  
22  
23  
24  
25  
26  
27  
28  
29  
30  
31  
32  
33  
34  
35  
36  
37  
38  
39  
40  
41  
42  
43  
44  
45  
46  
47  
48  
49  
50  
51  
52  
53  
54  
55  
56  
57  
58  
59  
60  
61  
62  
63  
64  
65

291 gene families were found apparently expanded and contracted, respectively, in *A. eriantha* (Fig.  
292 4c).

293

294 **Conclusion**

295 Here, we report a high-quality reference genome of kiwifruit *A. eriantha* cv. White. The  
296 assembly from single-molecular sequencing combined with Hi-C scaffolding yielded a highly  
297 continuous and complete genome than the two previously published kiwifruit genomes. This  
298 genome will provide a valuable source for exploration of genetic basis of unique traits in  
299 kiwifruit and also facilitate studies of sexual determination loci in the dioecious plants.

300

301 **Availability of supporting data**

302 This Whole Genome Shotgun project has been deposited at DBJ/ENA/GenBank under the  
303 accession QOVS000000000. The version described in this paper is version QOVS01000000. Raw  
304 sequencing reads have been deposited in the Sequence Read Archive (SRA) database under the  
305 accession number SRP155011. The *Actinidia eriantha* cv. White genome sequence and the  
306 annotation are also available via the *GigaScience* database, GigaDB [58]. Detailed protocols of  
307 computational analyses have been deposited in protocols.io [59].

308

309 **Competing interests**

310 The authors have no competing interests to declare.

311

312 **Abbreviation**

313 BLAST: Basic Local Alignment Search Tool;

1  
2  
3  
4  
5  
6  
7  
8  
9  
10  
11  
12  
13  
14  
15  
16  
17  
18  
19  
20  
21  
22  
23  
24  
25  
26  
27  
28  
29  
30  
31  
32  
33  
34  
35  
36  
37  
38  
39  
40  
41  
42  
43  
44  
45  
46  
47  
48  
49  
50  
51  
52  
53  
54  
55  
56  
57  
58  
59  
60  
61  
62  
63  
64  
65

314 CTAB: Cetyl trimethylammonium bromide;

315 NCBI: National Center for Biotechnology Information;

316 RNA-Seq: RNA sequencing;

317 PacBio: Pacific Biosciences;

318 SMRT: Single Molecule Real-Time;

319 Mb: megabase;

320 Gb: gigabase

321

322 **Acknowledgement**

323 This work was supported by grants from the National Natural Science Foundation of China  
324 (31471157 and 31700266), National Foundation for Germplasm Repository of Special  
325 Horticultural Crops in Central Mountain Areas of China (NJF2017-69), National Science Fund  
326 for Distinguished Young Scholars (30825030), Key Project from the Government of Sichuan  
327 Province (2013NZ0014, 2016NZ0105), Key Project from the Government of Anhui Province  
328 (2012AKKG0739;1808085MC57), and the US National Science Foundation (IOS-1339287 and  
329 IOS-1539831).

330

331 **Author contribution**

332 W.T., X.S. and J.Y. contributed equally to this work. W.T., J.Y., X.T., Y.Y., X.N., M.M., D.Z.,  
333 S.H., W.S., C.F. and M.L. collected plant samples, extracted DNA/RNA, and performed  
334 transcriptome sequencing and gene expression analyses; W.T., X.S., J.Y., X.T., C.J., Z.F. and  
335 Y.L. performed DNA sequencing, genome assembly, gene annotation, evolution and  
336 comparative genomic analyses, and website construction; X.S., W.T., Z.F. and Y.L. wrote and

1  
2  
3  
4  
5  
6  
7  
8  
9  
10  
11  
12  
13  
14  
15  
16  
17  
18  
19  
20  
21  
22  
23  
24  
25  
26  
27  
28  
29  
30  
31  
32  
33  
34  
35  
36  
37  
38  
39  
40  
41  
42  
43  
44  
45  
46  
47  
48  
49  
50  
51  
52  
53  
54  
55  
56  
57  
58  
59  
60  
61  
62  
63  
64  
65

revised the manuscript; Y.L. and Z.F. conceived strategies, designed experiments and managed projects. All authors read and approved the manuscript.

### Figure legends

**Figure 1.** Tree and fruits of *A. eriantha* cv. White.

**Figure 2.** Chromatin interaction map of *A. eriantha* derived from Hi-C data. Each group represents an individual chromosome.

**Figure 3.** Genome of *A. eriantha* and synteny between the two kiwifruit species. (a) Genome landscape of *A. eriantha* cv. White. Track A: gene density, Track B: repeat density, Track C: GC content; all were calculated in a 500-kb window; (b) Genome synteny between *A. eriantha* cv. White and *A. chinensis* cv. Red5.

**Figure 4.** Evolutionary and comparative genomic analyses. (a) Distribution of synonymous substitution rate ( $K_s$ ) between *A. eriantha* and *A. chinensis*, *S. lycopersicum* and *S. pennellii*, and *S. lycopersicum* and *S. tuberosum*; (b) Orthogroups shared by selected species; (c) Species phylogenetic tree and gene family evolution. Numbers on the branch indicate counts of gene family that under either expansion (red) or contraction (green).

**Figure S1.** Genome characteristics of *A. eriantha* and *A. chinensis*. (a) Flow cytometry analyses of *A. eriantha* cv. White and *A. chinensis* cv. Hongyang. The main peak (I) indicates G0/G1 cells

1  
2  
3  
4  
5  
6  
7  
8  
9  
10  
11  
12  
13  
14  
15  
16  
17  
18  
19  
20  
21  
22  
23  
24  
25  
26  
27  
28  
29  
30  
31  
32  
33  
34  
35  
36  
37  
38  
39  
40  
41  
42  
43  
44  
45  
46  
47  
48  
49  
50  
51  
52  
53  
54  
55  
56  
57  
58  
59  
60  
61  
62  
63  
64  
65

360 and the secondary peak (II) represents G2/M cells. (b) Flow cytometry analyses of *A. eriantha* cv.  
361 White and *Solanum lycopersicum* cv. Ailsa Craig. Peaks a and b represent the G0/G1 cells of  
362 ‘White’ and ‘Ailsa Craig’, respectively. The genome size of ‘White’ was estimated to be  
363 745.3±7.9 Mb using ‘Ailsa Craig’ as the reference. (c) 17-mer distribution of ‘White’ genomic  
364 reads (180bp paired-end library).

365

**Figure S2.** Examination of assembly inconsistencies between *A. eriantha* cv. White and *A.*  
366 *chinensis* cv. Red5. (a) Validation of genome assembly of ‘White’ using genetic maps.  
367 Horizontal lines within ‘White’ chromosomes indicate gapped regions and lines between  
368 chromosomes of two assemblies indicate syntenic regions. (b) A chromosomal segment  
369 assembled into the Chr23 in *A. chinensis* cv. Red5, is syntenic to the region located at the  
370 terminus of Chr19 in *A. eriantha* cv. White. (c) Snapshots of Illumina mate-pair reads mapped to  
371 the junctions of the break point as well as nearby regions supporting the assembly of ‘White’.

373

## Reference

1. Ferguson AR, Ferguson LR. Are kiwifruit really good for you? *Acta Hort* 2013;**610**:131-138
2. Richardson DP, Ansell J, Drummond LN. The nutritional and health attributes of kiwifruit: a review. *Eur J Nutr* 2018;1-18.
3. Li JQ, Li XW, Soejarto DD. Actinidiaceae. In: Wu ZY, Raven PH, Hong DY, eds. *Flora of China*. Beijing: Science Press & St. Louis: Missouri Plant Garden Press; 2007;**12**:pp334-362.
4. Ferguson AR, Huang H. Genetic resources of kiwifruit: domestication and breeding. *Hortic Rev.* 2007;**33**:1-121.
5. Testolin R. Kiwifruit (*Actinidia* spp.) in Italy: The history of the industry, international scientific cooperation and recent advances in genetics and breeding. *ISHS Acta Horticulturae* 2015;47-61.
6. Jo YS, Cho HS, Park MY, Bang GP. Selection of a sweet *Actinidia eriantha* 'bidan'. *ISHS Acta Horticulturae* 2017; 253-258.
7. Wu Y, Xie M, Zhang Q et al. Characteristics of 'White': a new easy-peel cultivar of *Actinidia eriantha*. *N Z J Crop Hortic Sci* 2009;**37**(4):369-373.
8. Atkinson RG, Sharma NN, Hallett IC et al. *Actinidia eriantha*: a parental species for breeding kiwifruit with novel peelability and health attributes. *N Z J For Sci* 2009;**39**:207-216.
9. Guo R, Landis JB, Moore MJ et al. Development and application of transcriptome-derived microsatellites in *Actinidia eriantha* (Actinidiaceae). *Front Plant Sci* 2017;**8**:1383.
10. Prakash R, Hallett IC, Wong SF et al. Cell separation in kiwifruit without development of a specialised detachment zone. *BMC Plant Biol.* 2017;**17**(1):86.
11. Shi ZJ, Zhang HQ, Hui Q et al. The resistance evaluation of different kiwifruit varieties to canker. *Acta Agriculturae Zhejiangensis* 2014;**26**(3):752-759
12. Zhang D, Gao C, Li R et al. TEOA, a triterpenoid from *Actinidia eriantha*, induces autophagy in SW620 cells via endoplasmic reticulum stress and ROS-dependent mitophagy. *Arch Pharm Res* 2017;**40**(5):579-591.
13. Wang T, Ran Y, Atkinson RG et al. Transformation of *Actinidia eriantha*: a potential species for functional genomics studies in Actinidia. *Plant Cell Rep.* 2006;**25**(5):425-431.
14. Wu JG, Ma L, Lin SH et al. Anticancer and anti-angiogenic activities of extract from *Actinidia eriantha* Benth root. *J Ethnopharmacol* 2017;**203**:1-10.
15. Huang S, Ding J, Deng D et al. Draft genome of the kiwifruit *Actinidia chinensis*. *Nat Commun* 2013;**4**:2640.
16. Pilkington SM, Crowhurst R, Hilario E et al. A manually annotated *Actinidia chinensis* var. *chinensis* (kiwifruit) genome highlights the challenges associated with draft genomes and gene prediction in plants. *BMC Genomics* 2018;**19**(1):257.
17. Petersen KR, Streett DA, Gerritsen AT et al. Super deduper, fast PCR duplicate detection in fastq files. *ACM* 2015;491-492.
18. Bolger AM, Lohse M, Usadel B. Trimmomatic: a flexible trimmer for Illumina sequence data. *Bioinformatics* 2014;**30**:2114-20.
19. Leggett RM, Clavijo BJ, Clissold L et al. NextClip: an analysis and read preparation tool for Nextera Long Mate Pair libraries. *Bioinformatics* 2013;**30**(4):566-568.
20. Rao SS, Huntley MH, Durand NC et al. A 3D map of the human genome at kilobase resolution reveals principles of chromatin looping. *Cell* 2014;**159**(7):1665-1680.
21. Haas BJ, Papanicolaou A, Yassour M et al. De novo transcript sequence reconstruction from RNA-seq using the Trinity platform for reference generation and analysis. *Nat Protoc* 2013;**8**(8):1494.
22. Pertea M, Pertea GM, Antonescu CM et al. StringTie enables improved reconstruction of a transcriptome from RNA-seq reads. *Nat Biotechnol* 2015;**33**(3):290-295.
23. Haas BJ, Delcher AL, Mount SM et al. Improving the Arabidopsis genome annotation using maximal transcript alignment assemblies. *Nucleic Acids Res* 2003;**31**(19):5654-5666.
24. Dobin A, Davis CA, Schlesinger F et al. STAR: ultrafast universal RNA-seq aligner. *Bioinformatics* 2013;**29**(1):15-21.

1  
2  
3  
4 425 25. Anders S, Pyl PT, Huber W. HTSeq—a Python framework to work with high-throughput  
5 426 sequencing data. *Bioinformatics* 2015;**31**(2):166-169.  
6 427 26. Vurture GW, Sedlazeck FJ, Nattestad M et al. GenomeScope: fast reference-free genome  
7 428 profiling from short reads. *Bioinformatics* 2017;**33**(14):2202-2204.  
8 429 27. Hopping ME. Flow cytometric analysis of *Actinidia* species. *N Z J Bot* 1994;**32**(1):85-93.  
9 430 28. Koren S, Walenz BP, Berlin K et al. Canu: scalable and accurate long-read assembly via adaptive  
11 431 k-mer weighting and repeat separation. *Genome Res* 2017;**27**(5):722-736.  
12 432 29. Chakraborty M, Baldwin-Brown JG, Long AD et al. Contiguous and accurate de novo assembly  
13 433 of metazoan genomes with modest long read coverage. *Nucleic Acids Res* 2016;**44**(19):e147.  
14 434 30. Walker BJ, Abeel T, Shea T et al. Pilon: an integrated tool for comprehensive microbial variant  
15 435 detection and genome assembly improvement. *PloS One* 2014;**9**(11):e112963.  
16 436 31. Servant N, Varoquaux N, Lajoie BR et al. HiC-Pro: an optimized and flexible pipeline for Hi-C  
17 437 data processing. *Genome Biol* 2015;**16**(1):259.  
18 438 32. Burton JN, Adey A, Patwardhan RP et al. Chromosome-scale scaffolding of de novo genome  
19 439 assemblies based on chromatin interactions. *Nat Biotechnol* 2013;**31**(12):1119.  
20 440 33. Kurtz S, Phillippy A, Delcher AL et al. Versatile and open software for comparing large genomes.  
21 441 *Genome Biol* 2004;**5**(2):R12.  
22 442 34. Zhang Q, Liu C, Liu Y et al. 2015. High-density interspecific genetic maps of kiwifruit and the  
23 443 identification of sex-specific markers. *DNA Res* 2015;**22**(5):367-375.  
24 444 35. Campbell M, Law M, Holt C et al. MAKER-P: a tool-kit for the rapid creation, management, and  
25 445 quality control of plant genome annotations. *Plant Physiol* 2013;**164**(2):513-524.  
26 446 36. Han Y, Wessler SR. MITE-Hunter: a program for discovering miniature inverted-repeat  
27 447 transposable elements from genomic sequences. *Nucleic Acids Res* 2010;**38**(22):e199.  
28 448 37. Gremme G, Steinbiss S, Kurtz S. GenomeTools: a comprehensive software library for efficient  
29 449 processing of structured genome annotations. *IEEE/ACM Trans Comput Biol Bioinform*  
30 450 2013;**10**(3):645-656.  
31 451 38. Korf I. Gene finding in novel genomes. *BMC Bioinformatics* 2004;**5**(1):59.  
32 452 39. Stanke M, Keller O, Gunduz I et al. AUGUSTUS: ab initio prediction of alternative transcripts.  
33 453 *Nucleic Acids Res.* 2006;**34**:W435-W439.  
34 454 40. Lomsadze A, Ter-Hovhannisyan V, Chernoff YO et al. Gene identification in novel eukaryotic  
35 455 genomes by self-training algorithm. *Nucleic Acids Res* 2005;**33**(20):6494-6506.  
36 456 41. Wang Z, Liu Y, Li D et al. Identification of circular RNAs in kiwifruit and their species-specific  
37 457 response to bacterial canker pathogen invasion. *Front Plant Sci.* 2017;**8**:413.  
38 458 42. Hoff KJ, Lange S, Lomsadze A et al. BRAKER1: Unsupervised RNA-Seq-Based Genome  
39 459 Annotation with GeneMark-ET and AUGUSTUS. *Bioinformatics* 2016;**32**(5):767-769.  
40 460 43. Keilwagen J, Wenk M, Erickson JL et al. Using intron position conservation for homology-based  
41 461 gene prediction. *Nucleic Acids Res* 2016;**44**(9):e89.  
42 462 44. Rhee SY, Beavis W, Berardini TZ et al. The Arabidopsis Information Resource (TAIR): a model  
43 463 organism database providing a centralized, curated gateway to Arabidopsis biology, research  
44 464 materials and community. *Nucleic Acids Res* 2003;**31**(1):224-228.  
45 465 45. Bairoch A, Boeckmann B. The SWISS-PROT protein sequence data bank. *Nucleic Acids Res*  
46 466 1991;**19**(Suppl):2247-2249.  
47 467 46. Bairoch A, Apweiler R. The SWISS-PROT protein sequence data bank and its supplement  
48 468 TrEMBL. *Nucleic Acids Res* 1997;**25**(1):31-36.  
49 469 47. Zdobnov EM, Apweiler R. InterProScan—an integration platform for the signature-recognition  
50 470 methods in InterPro. *Bioinformatics* 2001;**17**(9):847-848.  
51 471 48. Mi H, Lazareva-Ulitsky B, Loo R et al. The PANTHER database of protein families, subfamilies,  
52 472 functions and pathways. *Nucleic Acids Res* 2005;**33**(Suppl):D284-D288.  
53 473 49. Finn RD, Bateman A, Clements J et al. Pfam: the protein families database. *Nucleic Acids Res*  
54 474 2014;**42**(Database issue):D222-D230.

1  
2  
3  
4  
5  
6  
7  
8  
9  
10  
11  
12  
13  
14  
15  
16  
17  
18  
19  
20  
21  
22  
23  
24  
25  
26  
27  
28  
29  
30  
31  
32  
33  
34  
35  
36  
37  
38  
39  
40  
41  
42  
43  
44  
45  
46  
47  
48  
49  
50  
51  
52  
53  
54  
55  
56  
57  
58  
59  
60  
61  
62  
63  
64  
65

475 50. Schultz J, Copley RR, Doerks T et al. SMART: a web-based tool for the study of genetically mobile domains. *Nucleic Acids Res* 2000;**28**(1):231-234.

476

477 51. Bairoch A. PROSITE: a dictionary of sites and patterns in proteins. *Nucleic Acids Res* 1991;**19**(Suppl):2241-2245.

478

479 52. Conesa A, Götz S. Blast2GO: A comprehensive suite for functional analysis in plant genomics. *Int J Plant Genomics* 2008;**2008**:619832.

480

481 53. Wang Y, Tang H, DeBarry JD et al. MCScanX: a toolkit for detection and evolutionary analysis of gene synteny and collinearity. *Nucleic Acids Res* 2012;**40**(7):e49.

482

483 54. Ossowski S, Schneeberger K, Lucas-Lledó JI et al. The rate and molecular spectrum of spontaneous mutations in *Arabidopsis thaliana*. *Science* 2010;**327**(5961):92-94.

484

485 55. Emms DM, Kelly S. OrthoFinder: solving fundamental biases in whole genome comparisons dramatically improves orthogroup inference accuracy. *Genome Biol* 2015;**16**(1):157.

486

487 56. Nguyen LT, Schmidt HA, von Haeseler A et al. IQ-TREE: a fast and effective stochastic algorithm for estimating maximum-likelihood phylogenies. *Mol Biol Evol* 2014;**32**(1):268-74.

488

489 57. De Bie T, Cristianini N, Demuth JP et al. CAFE: a computational tool for the study of gene family evolution. *Bioinformatics* 2006;**22**(10):1269-71.

490

491 58. Tang W; Sun X; Yue J; Tang X; Jiao C; Yang Y; Niu X; Miao M; Zhang D; Huang S; Shi W; Li M; Fang C; Fei Z; Liu Y (2019): Supporting data for "Chromosome-scale genome assembly of kiwifruit *Actinidia eriantha* with single-molecule sequencing and chromatin interaction mapping" GigaScience Database. <http://dx.doi.org/10.5524/100568>

492

493

494

495 59. Tang W, Sun X, Yue J et al. Protocols for "Chromosome-scale genome assembly of kiwifruit *Actinidia eriantha* with single-molecule sequencing and chromatin interaction mapping." protocols.io 2019. <http://dx.doi.org/10.17504/protocols.io.vgse3we>.

496

497

498

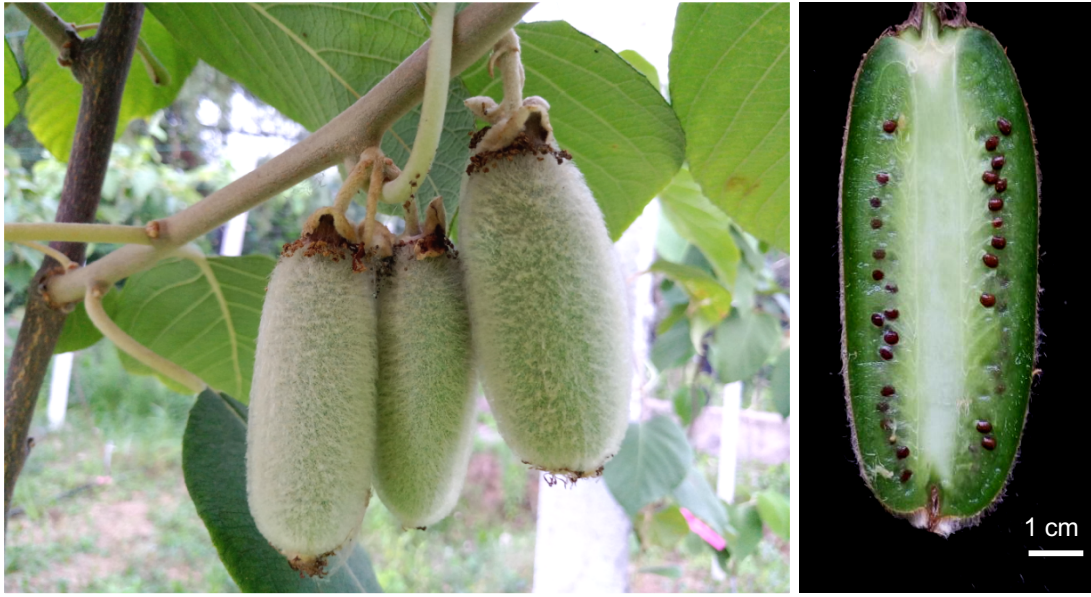

**Figure 1**



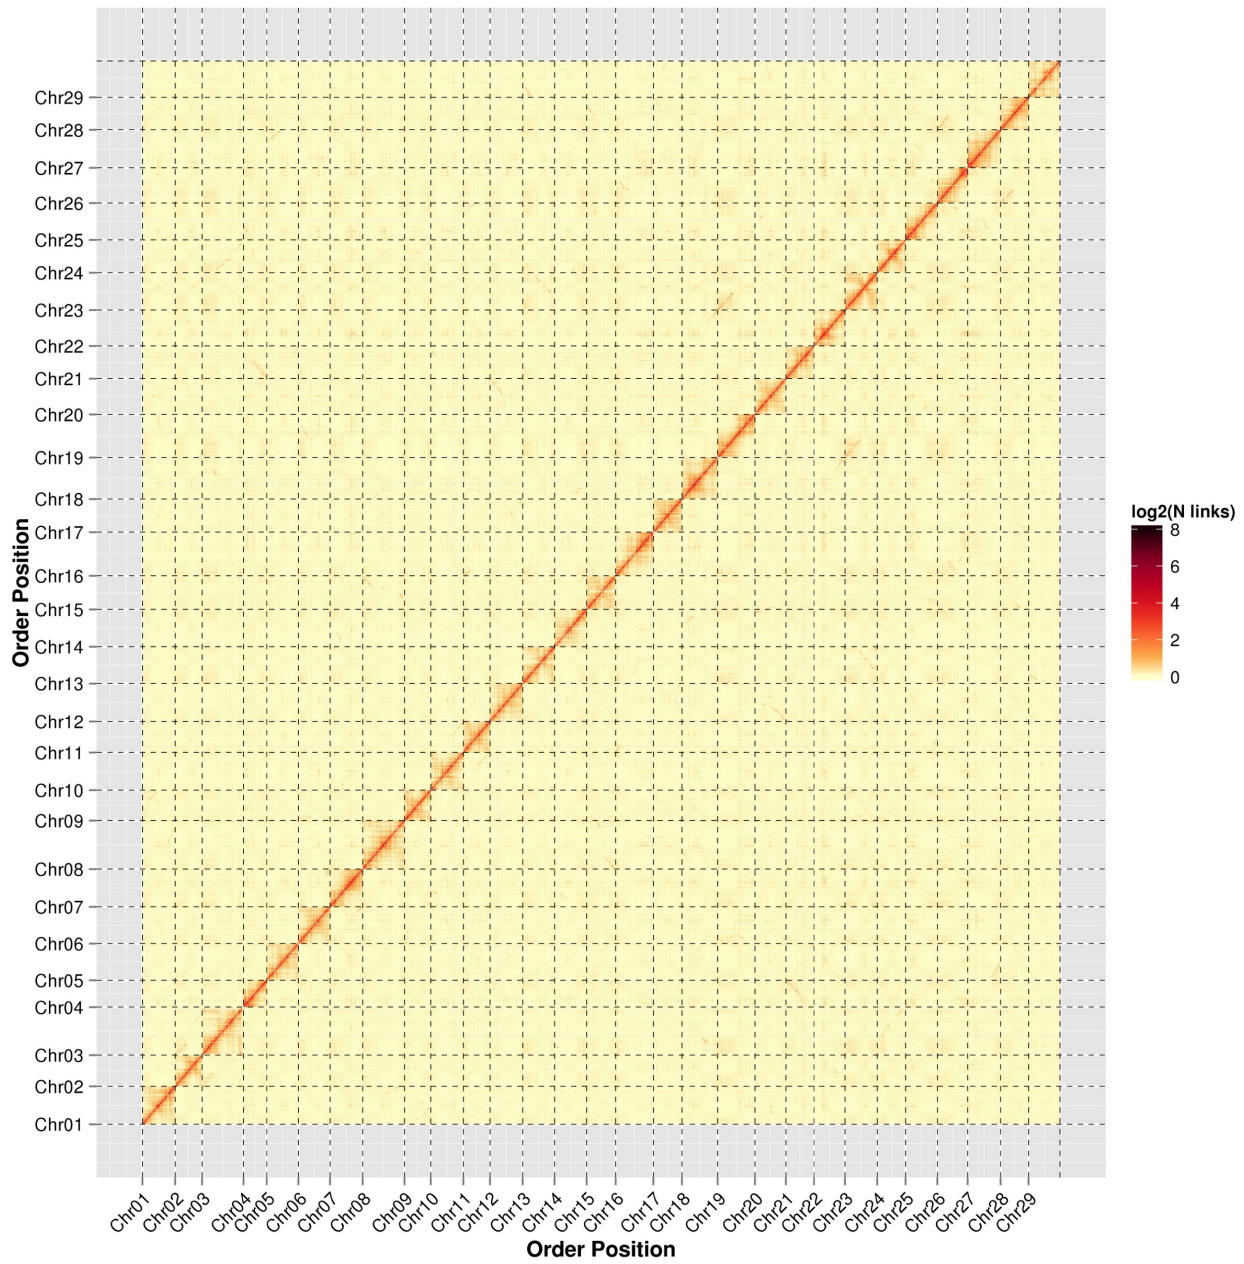

Figure 2.

a

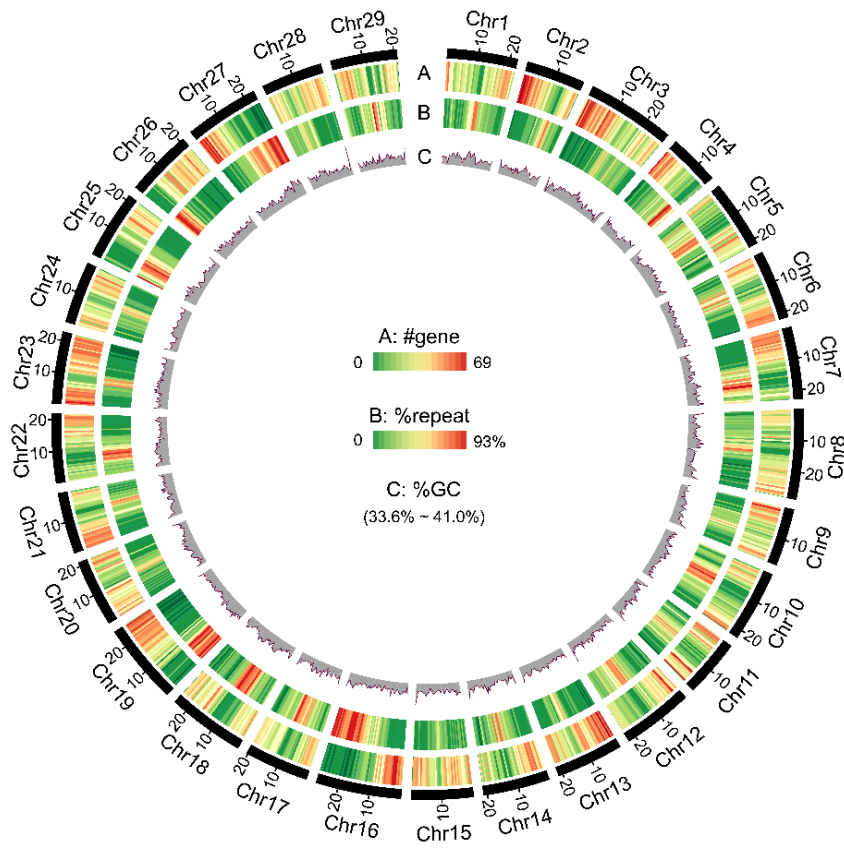

b

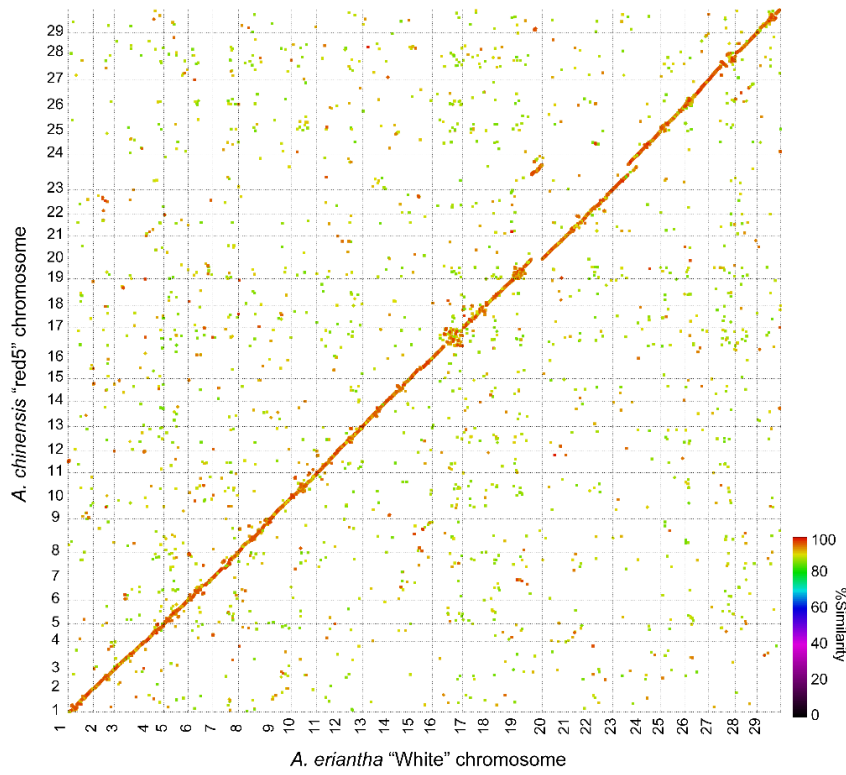

Figure 3

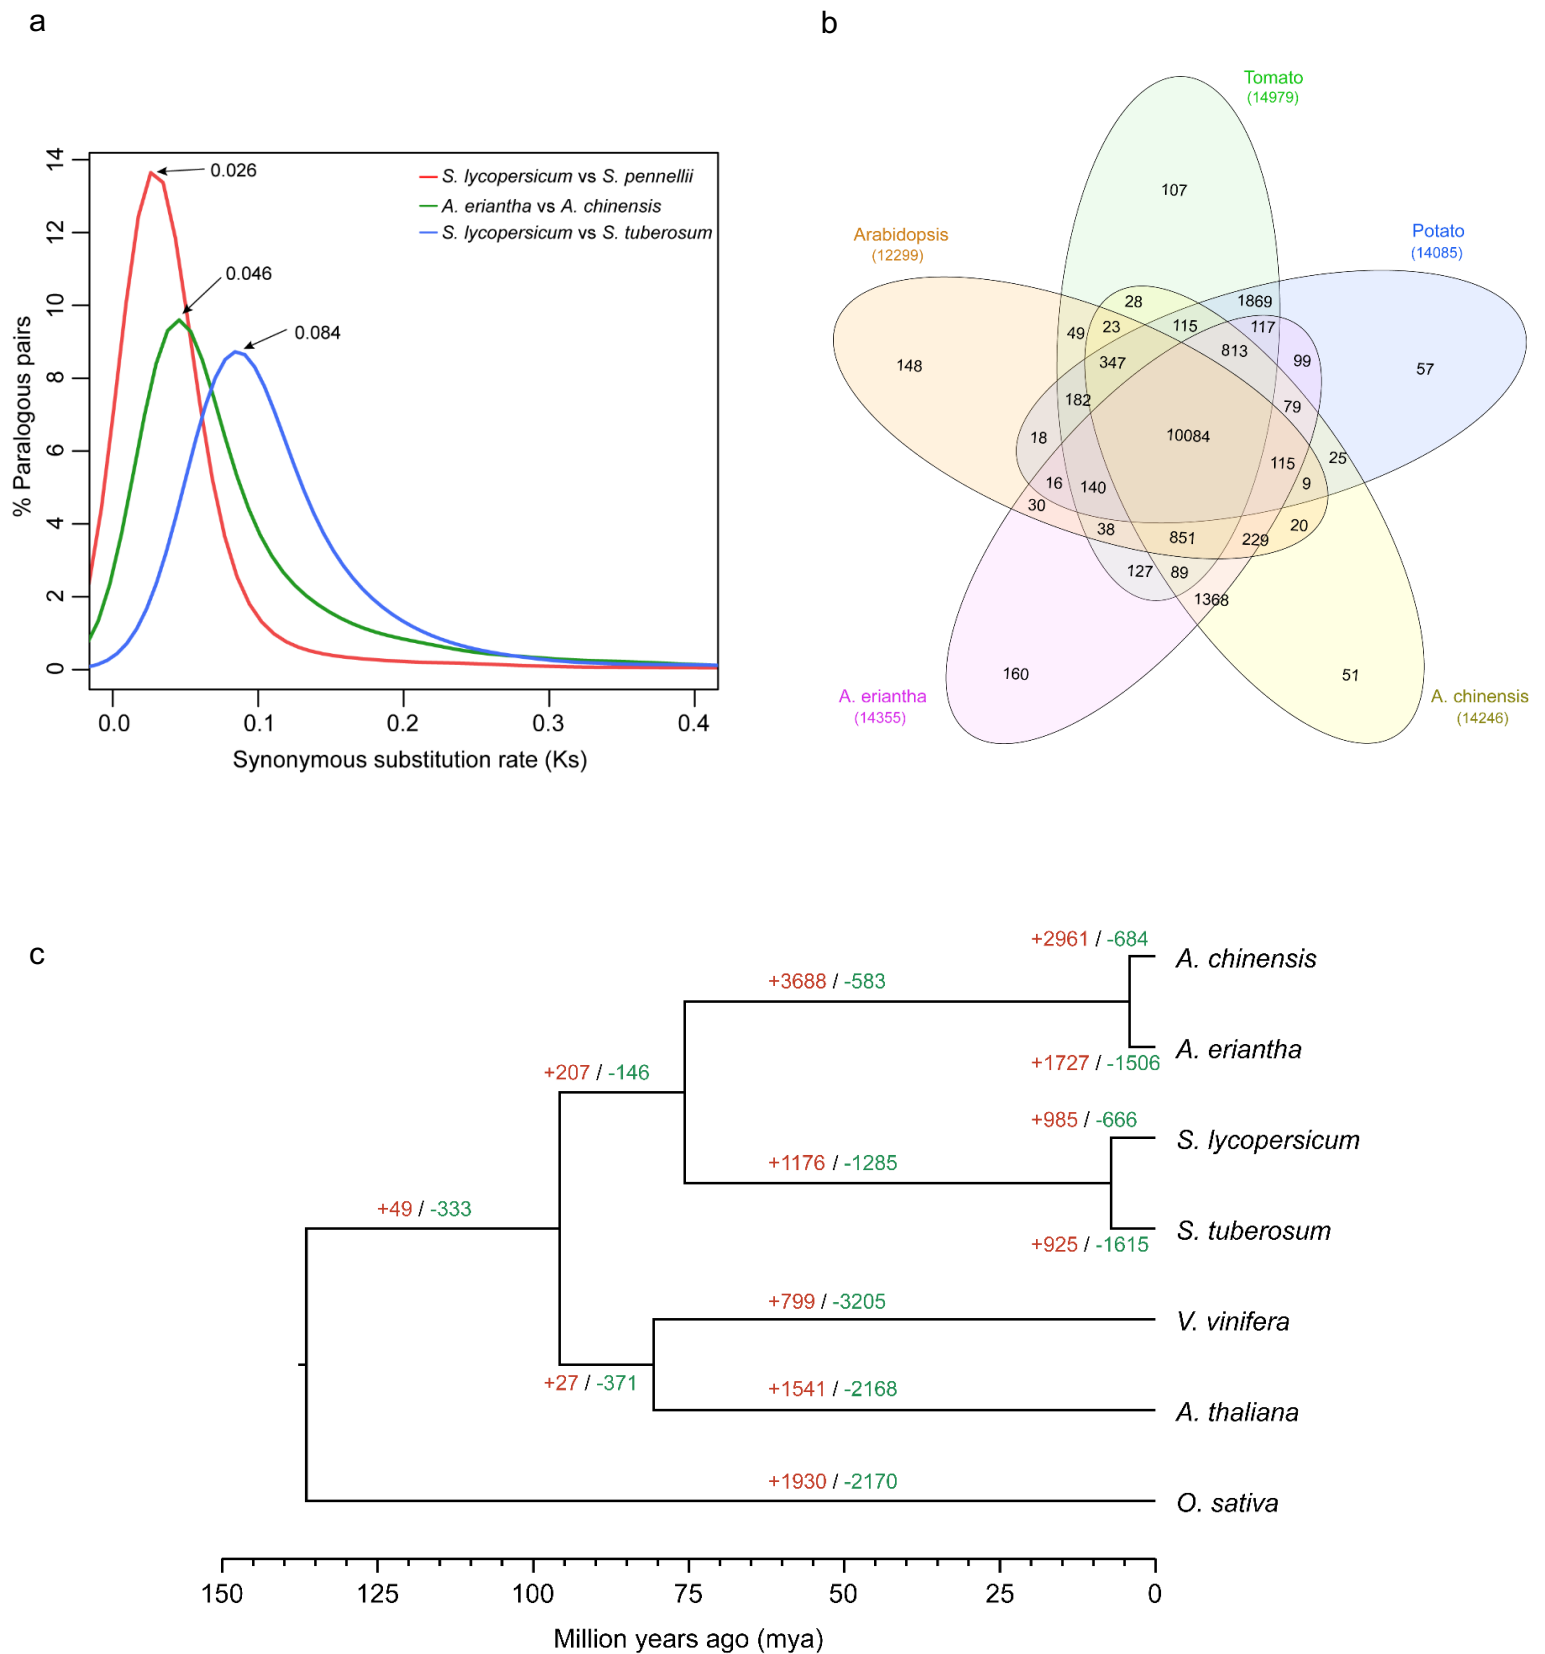

Figure 4



Click here to access/download  
**Supplementary Material**  
Supp\_Figures.pdf



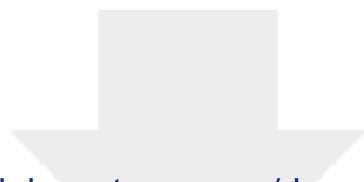

Click here to access/download  
**Supplementary Material**  
Supp\_Tables.xlsx

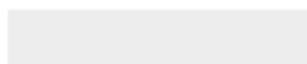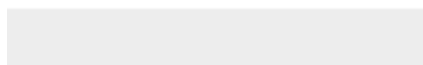

February 8, 2019

Dear Dr. Scott Edmunds:

Thank you for your time and effort in handling our manuscript titled “Chromosome-scale genome assembly of kiwifruit *Actinidia eriantha* with single-molecule sequencing and chromatin conformation capture” (manuscript reference number: GIGA-D-18-00282R3).

We have attached our detailed responses to the specific comments of the editor and the reviewer. We hope that we have addressed all the concerns and this revised manuscript is suitable for publication in GigaScience.

Sincerely,

Zhangjun Fei
