# Supplementary material for: Chromosome-scale genome assembly of kiwifruit Actinidia eriantha with single-molecule sequencing and chromatin interaction mapping
Source: PubMed Central journal article supplement (PMC6446220; doi:10.1093/gigascience/giz027), 2019-04-03
Supplement: giz027_response_to_reviewer_comments_revision_1.pdf [file giz027_response_to_reviewer_comments_revision_1.pdf]

## Author's Response To Reviewer Comments

Close

Please check our response letter as a supplementary pdf file.

Close

---
